# Supplementary material for: Prevalence of diabetes mellitus and associated risk factors in Nepal: findings from a nationwide population-based survey
Source: PubMed Central journal article supplement — BMJ Open. 2022 Feb 22;12(2):e060750. doi: 10.1136/bmjopen-2022-060750 (PMC8867329; doi:10.1136/bmjopen-2022-060750), 2022-02-22
Supplement: bmjopen-2022-060750.draft_revisions.pdf [file bmjopen-2022-060750.draft_revisions.pdf]

# BMJ Open

BMJ Open is committed to open peer review. As part of this commitment we make the peer review history of every article we publish publicly available.

When an article is published we post the peer reviewers' comments and the authors' responses online. We also post the versions of the paper that were used during peer review. These are the versions that the peer review comments apply to.

The versions of the paper that follow are the versions that were submitted during the peer review process. They are not the versions of record or the final published versions. They should not be cited or distributed as the published version of this manuscript.

BMJ Open is an open access journal and the full, final, typeset and author-corrected version of record of the manuscript is available on our site with no access controls, subscription charges or pay-per-view fees (<http://bmjopen.bmj.com>).

If you have any questions on BMJ Open's open peer review process please email [info.bmjopen@bmj.com](mailto:info.bmjopen@bmj.com)

# BMJ Open

## Prevalence of Diabetes Mellitus and Associated Risk Factors in Nepal: Findings from A Nationwide Population-Based Survey

|                               |                                                                                                                                                                                                                                                                                                                                                                                                                                                                                                                                     |
|-------------------------------|-------------------------------------------------------------------------------------------------------------------------------------------------------------------------------------------------------------------------------------------------------------------------------------------------------------------------------------------------------------------------------------------------------------------------------------------------------------------------------------------------------------------------------------|
| Journal:                      | <i>BMJ Open</i>                                                                                                                                                                                                                                                                                                                                                                                                                                                                                                                     |
| Manuscript ID                 | bmjopen-2022-060750                                                                                                                                                                                                                                                                                                                                                                                                                                                                                                                 |
| Article Type:                 | Original research                                                                                                                                                                                                                                                                                                                                                                                                                                                                                                                   |
| Date Submitted by the Author: | 03-Jan-2022                                                                                                                                                                                                                                                                                                                                                                                                                                                                                                                         |
| Complete List of Authors:     | Shrestha, Namuna; Nepal Health Research Council<br>Karki, Khem; Ministry of Health and Population<br>Poudyal, Anil; Nepal Health Research Council<br>Aryal , KK; Nepal Health Research Council, Research Section<br>Mahato, Namra ; Nepal Health Research Council<br>Gautam, Nitisha; Nepal Health Research Council<br>K.C., Dirghayu; Nepal Health Research Council, Research<br>Gyanwali, Pradip ; Nepal Health Research Council<br>Dhimal, Meghnath; Nepal Health Research Council<br>Jha, Anjani; Nepal Health Research Council |
| Keywords:                     | DIABETES & ENDOCRINOLOGY, PREVENTIVE MEDICINE, PUBLIC HEALTH                                                                                                                                                                                                                                                                                                                                                                                                                                                                        |
|                               |                                                                                                                                                                                                                                                                                                                                                                                                                                                                                                                                     |

SCHOLARONE™  
Manuscripts

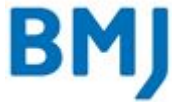

I, the Submitting Author has the right to grant and does grant on behalf of all authors of the Work (as defined in the below author licence), an exclusive licence and/or a non-exclusive licence for contributions from authors who are: i) UK Crown employees; ii) where BMJ has agreed a CC-BY licence shall apply, and/or iii) in accordance with the terms applicable for US Federal Government officers or employees acting as part of their official duties; on a worldwide, perpetual, irrevocable, royalty-free basis to BMJ Publishing Group Ltd ("BMJ") its licensees and where the relevant Journal is co-owned by BMJ to the co-owners of the Journal, to publish the Work in this journal and any other BMJ products and to exploit all rights, as set out in our [licence](#).

The Submitting Author accepts and understands that any supply made under these terms is made by BMJ to the Submitting Author unless you are acting as an employee on behalf of your employer or a postgraduate student of an affiliated institution which is paying any applicable article publishing charge ("APC") for Open Access articles. Where the Submitting Author wishes to make the Work available on an Open Access basis (and intends to pay the relevant APC), the terms of reuse of such Open Access shall be governed by a Creative Commons licence – details of these licences and which [Creative Commons](#) licence will apply to this Work are set out in our licence referred to above.

Other than as permitted in any relevant BMJ Author's Self Archiving Policies, I confirm this Work has not been accepted for publication elsewhere, is not being considered for publication elsewhere and does not duplicate material already published. I confirm all authors consent to publication of this Work and authorise the granting of this licence.

1  
2  
3 **1 Prevalence of Diabetes Mellitus and Associated Risk Factors in Nepal: Findings from A**  
4  
5  
6 **2 Nationwide Population-Based Survey**  
7

8  
9 3 Namuna Shrestha<sup>1#\*</sup>, Khem Bahadur Karki<sup>2#</sup>, Anil Poudyal<sup>1</sup>, Krishna Kumar Aryal<sup>3</sup>, Namra Kumar  
10  
11 4 Mahato<sup>1</sup>, Nitisha Gautam<sup>1</sup>, Dirghayu K.C.<sup>1</sup>, Pradip Gyanwali<sup>1</sup>, Meghnath Dhimal<sup>1</sup>, Anjani Kumar  
12  
13 5 Jha<sup>1</sup>  
14  
15

16 6 <sup>1</sup>Nepal Health Research Council, Ramshah Path, Kathmandu, Nepal  
17

18  
19 7 <sup>2</sup>Department of Community Medicine, Maharajgunj Medical Campus, Kathmandu, Nepal  
20  
21

22 8 <sup>3</sup>Monitoring, Evaluation and Operational Research (MEOR) Project, Abt Associates, Kathmandu,  
23  
24 9 Nepal  
25  
26

27  
28  
29  
30  
31 11 \*Correponding author: Namuna Shrestha, [namunashrestha12@gmail.com](mailto:namunashrestha12@gmail.com)  
32

33 12 #Equal contributions  
34  
35  
36  
37  
38  
39  
40  
41  
42  
43  
44  
45  
46  
47  
48  
49  
50  
51  
52  
53  
54  
55  
56  
57  
58  
59  
60

## 14 ABSTRACT

15 **Objectives** The burden of diabetes mellitus (DM) has increased globally, particularly in low-and  
16 middle-income countries, including Nepal. Population-based nationally representative data on  
17 the prevalence of DM is limited. This paper presents the prevalence of DM and its associated risk  
18 factors in Nepal.

19 **Research designs and methods** This population-based study sampled 13,200 participants aged  
20 20 years and above in 400 clusters of 72 districts of Nepal. The study used a standardised  
21 questionnaire adapted from the World Health Organization STEPwise approach to non-  
22 communicable disease risk factor surveillance instrument and digitalised in Android-compatible  
23 mobile phones. Fasting and two hours postprandial blood samples were taken to test various  
24 biochemical parameters. Descriptive followed by multivariate analyses were done to assess the  
25 association between explanatory variables and the outcome variable.

26 **Primary outcome measures** Prevalence of DM

27 **Results** The prevalence of DM was found to be 8.5% (95%CI:7.8-9.3). The odds of DM occurrence  
28 was higher in the upper age groups [40-59 years at adjusted odds ratio (AOR) 3.1(95%CI:2.3-4.2)  
29 and 60+ years at AOR 4.7(95%CI3.3-6.6)], compared to the group aged 20-39 years. Men were  
30 found to have higher odds of DM (AOR:1.3, 95%CI:1.1-1.6) compared to women. Urban residents  
31 had almost twice higher odds of DM (AOR:1.7, 95%CI:1.4-2.2) compared to rural residents.  
32 Participants with raised blood pressure (BP) (AOR: 2.2, 95% CI:1.8-2.7), those who were  
33 overweight and obese (AOR: 2.0, 95%CI:1.6-2.4) and those who had high triglyceride level

1  
2  
3 34 ( $\geq 150$ mg/dl) (AOR: 2.1, 95% CI: 1.8-2.6) also had twice higher odds of DM compared to those  
4  
5  
6 35 with normal BP, an average body mass index (BMI) and normal triglyceride level respectively.  
7

8  
9 36 **Conclusions** Targeted interventions to higher risk groups as well as prevention and control of  
10  
11 37 other associated biological risk factors might help to reduce the prevalence of DM in Nepal.  
12  
13

14 38

### 17 39 **Strengths and limitations of the study**

- 18  
19  
20  
21 40 • This study provided first nationally representative prevalence of DM in people aged 20  
22  
23 41 years and above measured through fasting and post-prandial blood sample.  
24  
25  
26 42 • In addition, the factors that were found to influence prevalence of DM in adult population  
27  
28 43 were also determined.  
29  
30  
31 44 • Although this study includes information on various risk factors for DM, we do not have  
32  
33 45 information on the physical activity and dietary habits of participants, which are known  
34  
35  
36 46 to be important predictors of DM.  
37  
38  
39  
40  
41  
42  
43  
44  
45  
46

## 48 INTRODUCTION

49 The burden of diabetes mellitus (DM) has increased globally. In 2019, approximately 463 million  
50 adults aged 20-79 years were living with diabetes worldwide(1), causing an estimated 1.5 million  
51 deaths(2). This number is expected to rise to 700 million by 2045(1) DM contributes to at  
52 least USD 727 billion in health expenses, with 12% of total spending on adults(3). The burden of  
53 DM in terms of prevalence and number has risen dramatically, particularly in low- and middle-  
54 income countries (LMICs)(4).

55 The prevalence of DM and related risk factors, including overweight and obesity, have increased  
56 across South Asia in recent decades(5). According to the International Diabetes Federation (IDF),  
57 an estimated 82 million adults aged 20-79 years were living with DM in the South East Asia Region  
58 (SEAR) in 2017, representing a regional prevalence of 8.5%(6). Factors like decline in nutrition  
59 quality, reduction in physical activity, and increase in sedentary behaviours are reflected in the  
60 increasing prevalence of type 2 diabetes and related risk factors in the region(5).The IDF reported  
61 the national prevalence of DM among people 20-79 years in Nepal to be 4% in 2017, which is  
62 expected to rise to 6.1% by 2045. In the same age group, 11.7% of total deaths were attributed  
63 to DM in Nepal(7). A systematic review carried out in 2014 showed a pooled prevalence of DM  
64 as 8.4%, with the variation in prevalence ranging from 1.4% to 19.0% in Nepal(8). Even though,  
65 there are several national estimates available on the prevalence of DM in Nepal(9-12), those  
66 studies were limited to small sample size or geographic location that would not be representative  
67 of the whole population in Nepal. In addition, criteria used for defining the prevalence of DM  
68 varied across studies. Furthermore, there is a lack of research identifying the predictors of type

1  
2  
3 69 2 diabetes in Nepal(9). This warrants a large scale study that is representative of the whole  
4  
5  
6 70 population, which provides a national (including subnational) prevalence of type 2 diabetes using  
7  
8 71 standard criteria and identifies its predictors.  
9

10  
11 72 This study reports the first nationally representative population-based prevalence of DM  
12  
13 73 measured through both fasting and postprandial (PP) blood sample including that in different  
14  
15  
16 74 sub-groups and factors associated with occurrence of DM in Nepal.  
17

## 18 19 75 **METHODS**

20  
21  
22 76 A population based cross sectional study was conducted covering all seven provinces of Nepal  
23  
24  
25 77 from 2016 to 2018. The sample size was calculated by considering the prevalence of raised blood  
26  
27 78 glucose ( $p=4\%$ ) from the 2013 non-communicable diseases (NCD) risk factors STEPS survey,  
28  
29  
30 79 Nepal(13). Ethical approval was sought from the Ethical Review Board(ERB) of the Nepal Health  
31  
32 80 Research Council (NHRC) with registration number 110/2016. Written informed consent was  
33  
34  
35 81 taken separately from the participants for physical measurements and laboratory tests. The study  
36  
37 82 was carried out among 13,200 participants aged 20 years and above using multistage cluster  
38  
39  
40 83 sampling technique. Men and women not providing consent to participate in either or both  
41  
42 84 stages of the study (questionnaire and physical measurements, or biochemical measurements)  
43  
44  
45 85 were excluded from that particular stage or both the stages depending upon the consent  
46  
47 86 received. Detail methodology for this study has been explained elsewhere(14).  
48  
49

## 50 87 **Data collection**

51  
52  
53 88 Data collection was done in two steps: first as face-to-face interview with a questionnaire and as  
54  
55  
56 89 second step physical measurements and collection of blood sample of the same participant with  
57



1  
2  
3 90 the prior appointments. Additional details on data collection such as orientation of field team has  
4  
5  
6 91 been explained previously(14). REMO-Research and Monitoring Software, was used to  
7  
8 92 programme the questionnaires into the mobile phones. This software was developed by Rooster  
9  
10 93 Logic, an Information and Communication Technology (ICT) company led by local engineers with  
11  
12  
13 94 focus on database creation and management, research, and monitoring. This software has been  
14  
15 95 extensively used for digital data collection in Nepal and allows small to large scale research  
16  
17  
18 96 projects to be conducted with ease and enables real-time monitoring of data. This software has  
19  
20 97 been used by the NHRC in various previous surveys(15, 16).

## 23 98 **Socio-demographic and behavioural information**

26 99 Information on socio-demographic and behavioural risk factors was collected through face-to-  
27  
28  
29 100 face interviews using an interviewer-administered questionnaire. Information was collected on  
30  
31 101 age, sex, ethnicity, educational status, marital status, occupation type, history of raised blood  
32  
33  
34 102 pressure and DM, alcohol consumption, and smoking habits. The commonly used classification  
35  
36 103 for ethnicity in Nepal has six categories: 1) Dalit (marginalized group of people, with relatively  
37  
38  
39 104 lower socio-economic and education status); 2) Disadvantaged Janajatis (disadvantaged group of  
40  
41 105 people and also indigenous, with relatively lower socio-economic and education status); 3)  
42  
43  
44 106 Disadvantaged non Dalit Terai Caste Groups (disadvantaged group of people from the Terai, the  
45  
46 107 lowlands, with relatively lower socio-economic and education status but not the dalit groups); 4)  
47  
48  
49 108 Religious Minorities (Muslim, Christian, etc.); 5) Relatively advantaged Janajatis (indigenous  
50  
51 109 group of people with relatively higher socio-economic status, such as Newar, Thakali, and  
52  
53  
54 110 Gurung); and 6) Upper Caste Groups (population with relatively higher socio-economic and  
55  
56 111 education status, mostly Brahmins, Chhetris, and Thakuri)(17).

1  
2  
3 112 Data on part of physical measurements, blood pressure measurement, and biochemical  
4  
5  
6 113 measurement was done using respective equipment and procedures, and the detail including the  
7  
8 114 information on quality control has been explained elsewhere(14). Participants were defined as  
9  
10 115 having DM if they had raised fasting glucose ( $\geq 126$ mg) or raised PP blood glucose level ( $\geq 200$ mg),  
11  
12  
13 116 or if the participants were on anti-diabetic medication at the time of the study(18, 19) whereas  
14  
15 117 the key definition of the terms raised blood pressure, body mass index, tobacco use, and alcohol  
16  
17  
18 118 consumption has been explained in the report published previously (14).  
19  
20

## 21 119 **Data management and analysis**

22  
23  
24 120 Data was extracted by the core team involved in data management, from the server where the  
25  
26  
27 121 collected data was stored. Data cleaning was performed using IBM SPSS® Statistics software  
28  
29 122 version 20.0 (IBM, U.S.A.). The cleaned data was then exported to Stata® version 13.0 for analysis  
30  
31  
32 123 (Stata Corp, U.S.A.). Descriptive results were produced for each of the outcome variables using  
33  
34 124 complex sample analysis considering the PSUs, strata and weight. Bivariate and multivariate  
35  
36  
37 125 analyses were used to assess the association between explanatory variables and the outcome  
38  
39 126 variable. All explanatory variables with  $p$ -value of  $< 0.05$  in the bivariate analysis were inserted in  
40  
41 127 the multivariate binary logistic regression model to see the independent effect of each variable  
42  
43  
44 128 on the occurrence of DM. The magnitude of the association was measured using the adjusted  
45  
46  
47 129 odds ratio (AOR) and 95% confidence interval (CI). A  $p$ -value  $< 0.05$  was considered as statistically  
48  
49 130 significant(20).  
50  
51  
52  
53  
54  
55  
56  
57  
58  
59  
60

### 131 **Patient and public involvement statement**

132 There was no involvement of patient in the study conception or design. However, experts in the  
133 relevant field were involved from the beginning and regular consultation was done with them.  
134 The findings from the study was disseminated to the general public and concerned stakeholders  
135 through a dissemination program.

## 136 **RESULTS**

137 The following section describes the results. It is divided into a descriptive picture of socio-  
138 demographic, behavioural and biological characteristics, and followed by the factors associated  
139 with the occurrence of DM.

### 140 **Socio-demographic characteristics**

141 Out of the 13,200 targeted participants, 12,557(95.3%) participated in the interview with a  
142 questionnaire (step 1), and 12,148 (92%) participated for the physical measurements and  
143 laboratory investigations (step 2). Socio-demographic characteristics of the participants are  
144 presented in Table 1. Among total of 12,557 participants, the majority of participants (76.8%)  
145 were in the age group 20-59 years. More than half of the participants (57.9%) were female. More  
146 people belonged to the upper caste groups (32.7%), followed by disadvantaged janajatis (20.7%).  
147 More than half (53.1%) were illiterate or never had formal schooling. Geographically, about one-  
148 fourth of the participants were from Bagmati province (24.7%), as it contained the capital city  
149 with dense population with the lowest proportion from Karnali Province (4.8%). More than half  
150 (51.5%) of the participants were urban dwellers.

151 **Table 1: Socio-demographic characteristics of the participants**

| <b>Variables</b> | <b>Characteristics (N=12557)</b>           | <b>N</b>                       | <b>%</b> |
|------------------|--------------------------------------------|--------------------------------|----------|
| <b>Age</b>       | 20-39                                      | 4,562                          | 35.5     |
|                  | 40-59                                      | 5,186                          | 41.3     |
|                  | 60 years and above                         | 2,809                          | 23.3     |
| <b>Sex</b>       | Male                                       | 4,908                          | 42.2     |
|                  | Female                                     | 7,649                          | 57.9     |
| <b>Ethnicity</b> | Upper caste groups                         | 4,263                          | 32.7     |
|                  | Disadvantaged janajatis                    | 2,656                          | 20.7     |
|                  | Relatively advantaged janajatis            | 2,077                          | 17.0     |
|                  | Disadvantaged non-dalit terai caste groups | 1,900                          | 17.0     |
|                  | Dalits                                     | 1,298                          | 9.6      |
|                  | Religious minorities                       | 363                            | 2.9      |
|                  | <b>Education</b>                           | Illiterate/No formal schooling | 6,820    |
|                  | Below secondary (<10 years)                | 2,839                          | 22.3     |
|                  | Secondary and above (≥10 years)            | 2,898                          | 24.6     |
| <b>Province</b>  | Province 1                                 | 2,185                          | 17.6     |
|                  | Province 2                                 | 2,083                          | 18.4     |
|                  | Bagmati Province                           | 3,223                          | 24.7     |

|                           |                       |       |      |
|---------------------------|-----------------------|-------|------|
|                           | Gandaki Province      | 1,337 | 9.6  |
|                           | Province 5            | 2,070 | 15.9 |
|                           | Karnali Province      | 601   | 4.8  |
|                           | Sudurpaschim Province | 1,058 | 9.1  |
| <b>Place of residence</b> | Rural                 | 6,300 | 48.5 |
|                           | Urban                 | 6,257 | 51.5 |

152

### 153 Behavioural and biological characteristics

154 About one third of the participants (31.9%) said that they were smokers. Nearly one fourth of the  
 155 participants (24.6%) reported that they were current alcohol drinkers. Raised blood pressure was  
 156 prevalent among 36.9% of the participants. The proportion of participants who were either  
 157 overweight or obese was 30.7%. More than one-third (35.7%) of participants had raised  
 158 triglycerides. Behavioural and biological characteristics of the participants are presented in Table  
 159 2.

160 **Table 2: Behavioural and biological characteristics of the participants**

| Variables                         | Characteristics (N=12557) | N     | % (95% CI)      |
|-----------------------------------|---------------------------|-------|-----------------|
| <b>Smoking habit</b>              | Smokers                   | 3,955 | 31.9(30.3-33.5) |
|                                   | Non-smoker                | 8,602 | 68.1(66.5-69.7) |
| <b>Users of smokeless tobacco</b> | Users                     | 3,087 | 25.4(24.1-26.8) |

|                                                            |                      |        |                  |
|------------------------------------------------------------|----------------------|--------|------------------|
| <b>products</b>                                            | Non-users            | 9,470  | 74.6(73.3-75.9)  |
| <b>Users of either smoke or smokeless tobacco products</b> | Users                | 1,609  | 13.1(12.2-14.1)  |
|                                                            | Non-users            | 10,948 | 86.9(86.0-87.8)  |
| <b>Alcohol consumption</b>                                 | Yes                  | 3,115  | 24.6(22.98-26.3) |
|                                                            | No                   | 9,442  | 75.4(73.7-77.02) |
| <b>Blood pressure</b>                                      | Raised               | 4,504  | 36.9(35.4-38.5)  |
|                                                            | Normal               | 8,053  | 63.1(61.6-64.6)  |
| <b>Body mass index (N=12,556)</b>                          | Underweight          | 1,534  | 12.3(11.3-13.4)  |
|                                                            | Normal               | 7,156  | 57.0(55.6-58.5)  |
|                                                            | Overweight and obese | 3,866  | 30.7(28.9-32.5)  |
| <b>Increased Waist Hip ratio (N=11,997)</b>                | Increased            | 6,896  | 55.3(53.9-56.7)  |
|                                                            | Normal               | 5,101  | 44.7(43.4-46.1)  |
| <b>Total cholesterol (N=10,861)</b>                        | Raised               | 3,120  | 28.8(27.3-30.4)  |
|                                                            | Normal               | 7,741  | 71.2(69.6-72.7)  |
| <b>Triglyceride (N=10,986)</b>                             | Raised               | 3,862  | 35.7(34.2-37.2)  |
|                                                            | Normal               | 7,124  | 64.3(62.8- 65.9) |

161

## 162 **Factors associated with diabetes mellitus**

163 The overall prevalence of DM was 8.5% (95%CI:7.8-9.3). The following two tables (Table 3 and 4)  
164 show the results on factors associated with DM, along with prevalence of DM among the different  
165 subgroups examined. Table 3, above, shows the prevalence of DM across subgroups by different  
166 background characteristics, and the factors associated with occurrence of DM through  
167 multivariate analysis in terms of AOR. The prevalence of DM is seen to have increased with age.  
168 Participants in the age group of 60 years and above had about 5 times higher odds of having DM  
169 (AOR: 4.7, 95%CI:3.3-6.6) compared to those in the age group of 20 to 39 years. Similarly, male  
170 participants had higher odds of having DM (AOR: 1.3, 95%CI:1.1-1.6) compared to female  
171 participants. Urban residents had about 2 times higher odds of having DM (AOR: 1.7, 95%CI:1.4-  
172 2.2) compared to those residing in rural area. Table 4 above shows the prevalence of DM across  
173 subgroups by different behavioural and biological characteristics and the factors associated with  
174 occurrence of DM through multivariate analysis in terms of AOR. Participants with raised blood  
175 pressure had about 2 times higher odds of having DM compared to those whose blood pressure  
176 was normal (AOR: 2.2, 95% CI: 1.8-2.7). Regarding body mass index, participants who were  
177 overweight and obese had two times higher odds of having DM than those with normal body  
178 mass index (AOR: 2.0, 95% CI: 1.6-2.4). Participants who had high triglyceride level ( $\geq 150$ mg/dl)  
179 had about 2 times higher odds of having DM than their counterparts (AOR: 2.1, 95% CI: 1.8-2.6).

180

181

182

183 **Table 3: Association of socio-demographic factors with diabetes mellitus**

| Variables and characteristics              | Number of Participants | Proportion with DM (%) | Odds of having DM |                 |
|--------------------------------------------|------------------------|------------------------|-------------------|-----------------|
|                                            |                        |                        | COR (95% CI)      | AOR (95% CI)    |
| <b>Age</b>                                 |                        |                        |                   |                 |
| 20-39                                      | 4,046                  | 115 (3.0)              | 1                 | 1               |
| 40-59                                      | 4,723                  | 469(10.4)              | 3.7(2.9-4.9)***   | 3.1(2.3-4.2)*** |
| 60 years and above                         | 2,508                  | 300(13.3)              | 4.9 (3.7-6.5)***  | 4.7(3.3-6.6)*** |
| <b>Sex</b>                                 |                        |                        |                   |                 |
| Female                                     | 6,952                  | 436(6.7)               | 1                 | 1               |
| Male                                       | 4,325                  | 448(11.0)              | 1.7(1.5-2.0)***   | 1.3(1.1- 1.6)** |
| <b>Ethnicity</b>                           |                        |                        |                   |                 |
| Disadvantaged janajatis                    | 1,130                  | 68(6.6)                | 1                 | 1               |
| Dalits                                     | 2,369                  | 151(6.7)               | 1.0(0.7-1.4)      | 1.3(0.8-1.9)    |
| Disadvantaged non-dalit terai caste groups | 1,690                  | 127(8.4)               | 1.3(1.0-1.7)      | 1.5(1.1-2.1)*   |
| Religious minorities                       | 285                    | 38(17.5)               | 2.9(1.7-5.0)***   | 2.4(1.2-4.7)*   |
| Relatively advantaged janajatis            | 1,884                  | 210(11.9)              | 1.9(1.4-2.5)***   | 1.2(0.9-1.6)    |
| Upper caste groups                         | 3,919                  | 290(7.8)               | 1.2(0.9-1.5)      | 1.0(0.7-1.3)    |



|                                 |       |           |                 |                 |
|---------------------------------|-------|-----------|-----------------|-----------------|
| <b>Education</b>                |       |           |                 |                 |
| Illiterate/No formal schooling  | 6,128 | 535(8.4)  | 1               | 1               |
| Below secondary (<10 years)     | 2,548 | 196(7.9)  | 1.0(0.8-1.2)    | 1.1(0.8-1.4)    |
| Secondary and above (≥10 years) | 2,601 | 274(10.1) | 1.3(1.1-1.6)**  | 1.4(1.1-1.8)*   |
| <b>Province</b>                 |       |           |                 |                 |
| Karnali Province                | 565   | 16(3.2)   | 1               | 1               |
| Province 1                      | 1,909 | 134(7.7)  | 2.5(1.2-5.2)*   | 2.2(1.1-4.4)*   |
| Province 2                      | 1,845 | 138(8.5)  | 2.8(1.3-5.8)**  | 1.8(0.9-3.7)    |
| Bagmati Province                | 2,820 | 298(11.5) | 3.9(1.9-8.0)*** | 1.8(0.9-3.5)    |
| Gandaki Province                | 1,249 | 79(6.7)   | 2.2(1.0-4.6)*   | 1.1(0.6-2.3)    |
| Lumbini                         | 1,905 | 170(9.6)  | 3.2(1.5-6.6)**  | 1.9(0.9-3.8)    |
| Sudurpaschim Province           | 984   | 49(5.2)   | 1.6(0.7-3.8)    | 1.5(0.7-3.5)    |
| <b>Place of residence</b>       |       |           |                 |                 |
| Rural                           | 5,663 | 277(5.5)  | 1               | 1               |
| Urban                           | 5,614 | 607(11.3) | 2.2(1.8-2.7)*** | 1.7(1.4-2.2)*** |

184 1 Reference category, \*p value≤0.05 \*\*p value≤0.01 \*\*\*p value≤0.0001

185 **Table 4: Association of behavioural and biological factors with diabetes mellitus**

| Characteristics                                            | Number of Participants | Proportion with DM<br>n (%) | Odds of having DM |              |
|------------------------------------------------------------|------------------------|-----------------------------|-------------------|--------------|
|                                                            |                        |                             | COR (95% CI)      | AOR (95% CI) |
| <b>Smoking habit</b>                                       |                        |                             |                   |              |
| Non smoker                                                 | 7,789                  | 581(8.0)                    | 1                 | 1            |
| Smokers                                                    | 3,488                  | 303(9.5)                    | 1.2(1.0-1.4)*     | 1.0(0.9-1.3) |
| <b>Users of smokeless tobacco products</b>                 |                        |                             |                   |              |
| Nonusers                                                   | 8,544                  | 642(8.1)                    | 1                 | -            |
| Users                                                      | 2,733                  | 242(9.7)                    | 1.2(1.0-1.5)*     | -            |
| <b>Users of either smoke or smokeless tobacco products</b> |                        |                             |                   |              |
| Nonusers                                                   | 9,857                  | 751(8.3)                    | 1                 | -            |
| Users                                                      | 1,420                  | 133(10.1)                   | 1.2(1.0-1.5)      | -            |
| <b>Alcohol consumption</b>                                 |                        |                             |                   |              |
| No                                                         | 8,538                  | 657(8.4)                    | 1                 | -            |
| Yes                                                        | 2,739                  | 227(8.7)                    | 1.0(0.9-1.2)      | -            |
| <b>Blood pressure</b>                                      |                        |                             |                   |              |
| Normal                                                     | 7,197                  | 311 (4.6)                   | 1                 | 1            |

|                                             |       |            |                      |                 |
|---------------------------------------------|-------|------------|----------------------|-----------------|
| Raised                                      | 4,080 | 573 (15.1) | 3.7 (3.1-4.4)<br>*** | 2.2(1.8-2.7)*** |
| <b>Body mass index (N=12,556)</b>           |       |            |                      |                 |
| Normal                                      | 6,378 | 355 (6.1)  | 1                    | 1               |
| Underweight                                 | 1,365 | 51 (4.0)   | 0.6(0.4-0.9) *       | 0.8(0.5-1.1)    |
| Overweight and obese                        | 3,534 | 478 (14.6) | 2.6(2.2-3.1)<br>***  | 2.0(1.6-2.4)*** |
| <b>Increased Waist Hip ratio (N=11,158)</b> |       |            |                      |                 |
| No                                          | 4,683 | 347 (8.0)  | 1                    | -               |
| Yes                                         | 6,475 | 527 (8.9)  | 1.1(0.9-1.4)         | -               |
| <b>Total cholesterol (N=10,837)</b>         |       |            |                      |                 |
| Normal                                      | 7,722 | 478 (7.0)  | 1                    | 1               |
| Raised                                      | 3,115 | 357 (11.8) | 1.8(1.5-2.1)<br>***  | 1.0(0.8-1.2)    |
| <b>Triglyceride (N=10,960)</b>              |       |            |                      |                 |
| Normal                                      | 7,103 | 334 (5.0)  | 1                    | 1               |
| Raised                                      | 3,857 | 479 (13.4) | 2.9 (2.5-3.5)<br>*** | 2.1(1.8-2.6)*** |

186 1 Reference category, \*p value≤0.05 \*\*p value≤0.01\*\*\* p value≤0.0001

## 187 DISCUSSION

188 The first nationally representative study identified high prevalence of DM among the  
189 participants, which is higher than the figure reported by a recent non-communicable disease risk  
190 factors survey (5.8%)(21) and IDF's estimate for Nepal i.e 4% in 2017(22). However, the  
191 prevalence of DM is similar to the findings observed in a systematic review (pooled prevalence-  
192 -8.4%, 95% CI: 6.2-10.5%), which summarised the prevalence of type 2 diabetes in Nepal for a  
193 period of 14 years (8). Similar figure (8.5%, 95% CI: 6.9-10.4%) was reported in another systematic  
194 review conducted in Nepal(21). Our finding is also in line with the WHO estimates for DM in Nepal  
195 which reported a prevalence of 9.1% in 2016(23). The latest estimates from the global burden of  
196 disease study, however, show a national prevalence of 4.4% of diabetes type 2(24). Likewise,  
197 WHO global report on DM also estimated a regional prevalence of 8.6% in South East Asia (SEA)  
198 in 2014, which is consistent with the findings from our study(4). The finding from our study is  
199 similar to estimates of DM prevalence from different studies in the neighbouring countries,  
200 including India (8.7%)(25), China (10.9%)(26), Sri Lanka (8.4%), Bhutan (7.7%), Maldives (7.5%)  
201 and Bangladesh (6.8%)(22). The prevalence of DM in our study may be attributed to a  
202 combination of factors including rapid urbanisation, changing lifestyles, unhealthy diets, tobacco  
203 use, and increasing life expectancy. Adding to this, several challenges prevailing around diabetes  
204 management such as high treatment cost, availability of limited health facilities, lack of awareness  
205 about the disease and particularly no specific guideline available for the prevention and  
206 treatment of the disease in Nepal might have exacerbated the burden of this disease(10).

1  
2  
3 207 Our study reports that age was significantly associated with DM, with older aged people (60 years  
4  
5  
6 208 and above) having higher odds of having DM. Older age as an important predictor for DM is  
7  
8 209 consistent with the findings of studies from different contexts(8, 9, 27-30). The life expectancy of  
9  
10 210 Nepalese people has increased from 58 years in 1990 to 71 years in 2019(24) and the proportion  
11  
12  
13 211 of the older population is growing (31), which further tends to increase in future(32). With aging,  
14  
15 212 skeletal muscle insulin sensitivity might be impaired which in turn increase the risk of insulin  
16  
17  
18 213 resistance and type 2 diabetes(33). The findings of the study and these factors underscore the  
19  
20 214 need of tailored interventions for management and control of DM among population with higher  
21  
22  
23 215 age. Further to this our study showed that, male had higher odds of having DM than females.  
24  
25 216 This finding is supported by an another study conducted in Nepal, which identified being female  
26  
27  
28 217 as significant protective factor for DM (AOR: 0.4, 95% CI: 0.3-0.7)(9). A systematic review  
29  
30 218 conducted in South Asia also supported the findings from our study, indicating being male as a  
31  
32  
33 219 significant risk factor for DM(34). However, this is in contrast to the findings reported in a  
34  
35 220 different systematic review suggesting that females were at higher risk of DM in Nepal (OR:1.6,  
36  
37  
38 221 95% CI: 1.3-1.9)(8). Higher prevalence of DM among men has been associated with large amount  
39  
40 222 of visceral fat in men(35). Besides, lower tendency of women to develop visceral adiposity may  
41  
42  
43 223 explain that women are protected from DM in comparison to men(36).  
44  
45 224 Our study reported that urban residents were more likely to have DM compared to those residing  
46  
47  
48 225 in rural areas. Nepal has been experiencing an increasing rate in urbanization(37). Increasing  
49  
50 226 urbanization leading to change in dietary pattern, sedentary lifestyle, reduction in physical  
51  
52  
53 227 activity might have contributed to the higher burden of DM. Complementing this result, findings  
54  
55 228 from NCDs STEPS survey 2019 suggests inadequate intake of fruits and vegetables and lower  
56  
57  
58  
59  
60

1  
2  
3 229 participation in physical activity among urban population compared to their rural  
4  
5  
6 230 counterparts(38). All these factors might have some contributing role towards higher prevalence  
7  
8 231 of DM among urban population. Similar to the findings from this study, an epidemiological survey  
9  
10 232 conducted by the Nepal Diabetes Association found higher prevalence (14.6%) of DM in urban  
11  
12  
13 233 area in comparison to rural area (2.5%) (39, 40). Consistent with the findings from our study, a  
14  
15 234 systematic review also found the pooled prevalence of DM to be higher (8.1%, 95% CI: 7.3-  
16  
17 235 8.9%)in urban areas compared to rural areas in Nepal (1.03%, 95% CI: 0.7-1.3%)(8). A study from  
18  
19  
20 236 Myanmar also presented similar findings of higher prevalence in urban areas compared to rural  
21  
22  
23 237 areas (12.1% vs 7.1%)(41). Studies have reported between two to five times higher odds of having  
24  
25 238 DM and pre-DM in association with urban residence(42, 43).

26  
27  
28 239 Our study showed that participants with raised blood pressure had about two times higher odds  
29  
30  
31 240 of having DM compared to those whose blood pressure was normal. This result is consistent with  
32  
33 241 findings from South Asia(34), Ethiopia(44) and Nepal(8). The prevalence of hypertension and DM  
34  
35 242 has been increasing in Nepal, however, the progress towards its effective prevention, treatment  
36  
37  
38 243 and control is found to be low(9, 45). With the coexisting conditions of hypertension and DM, the  
39  
40  
41 244 importance of secondary prevention (screening, timely diagnosis and treatment) of both these  
42  
43 245 conditions is of paramount importance.

44  
45  
46 246 Overweight and obesity are important risk factors for DM (5, 44, 46). Our study showed that  
47  
48 247 participants who were overweight and obese had about 2 times higher odds of having DM than  
49  
50  
51 248 those with a normal BMI. Consistent with the findings from our study, a meta-analysis performed  
52  
53 249 among Indian adults showed a statistically significant association between obesity and type 2 DM  
54  
55 250 (OR = 1.14, 95%CI: 1.0-1.2)(47). Similar findings were observed in different studies conducted in

1  
2  
3 251 South Asia(34), US(48), Ethiopia(44) and Nepal(49). Overweight and obesity has been increasing  
4  
5  
6 252 in Nepal particularly among women(50). Obesity being a strong predictor for DM, there is a need  
7  
8 253 to take preventive actions to control obesity which might in turn provide some level of control of  
9  
10 254 growing DM prevalence in the country.

11  
12  
13 255 The other variable that showed significant association with the prevalence of DM was triglyceride  
14  
15 256 level. Participants with a high triglyceride level ( $\geq 150\text{mg/dl}$ ) had about 2 times higher odds of  
16  
17 257 having DM than their counterparts. This is in line with findings from studies conducted elsewhere,  
18  
19 258 including in Ethiopia(44), Bangladesh(51) and China(52). Similar findings have been reported by  
20  
21 259 different previous studies from Nepal(53-55). This also highlights the need of interventions for  
22  
23 260 prevention and control of several of these metabolic risk factors such as dyslipidemia so as to  
24  
25 261 achieve DM control in Nepal.

26  
27  
28 262 Besides the factors explained above, the provincial differences in prevalence of DM (though not  
29  
30 263 seen as statistically significant after multivariate analysis) also highlights the importance of  
31  
32 264 tailoring interventions to the provinces with higher prevalence such as Province 1, 2, 5 and  
33  
34 265 Bagmati Province.

35  
36  
37 266 Our study has several strengths and limitations. Major strengths include: a large sample size,  
38  
39 267 coverage of rural and urban residences; all three ecological belts of the country (the Terai, hills  
40  
41 268 and mountains); and all provinces of Nepal. This approach provided nationally representative  
42  
43 269 data and increased its generalizability among the Nepalese population. The study also provided  
44  
45 270 detailed information on the possible association with a wide range of risk factors for DM.  
46  
47 271 However, the cross-sectional nature of the study did not allow for a causal relationship to be  
48  
49 272 established between these risk factors and the prevalence of DM. In addition, no information

1  
2  
3 273 was collected on the physical activity and dietary habits of participants, which have been  
4  
5  
6 274 established as important predictors of DM in other studies (56-59).  
7

## 8 9 275 **CONCLUSIONS**

10  
11  
12 276 Our study showed DM to be more prevalent among individuals aged 20 years and above. Older  
13  
14 277 age, male gender, residing in urban areas, high BMI, raised blood pressure, and raised triglyceride  
15  
16 278 level independently predicted the occurrence of DM in this study. Findings suggest that targeted  
17  
18 279 DM prevention and control interventions, especially to those population groups with higher  
19  
20 280 chances of DM occurrence, in addition to prevention and control of the biological risk factors  
21  
22 281 associated with DM through appropriate measures, would help curb the prevalence of DM in  
23  
24 282 Nepal.  
25  
26  
27  
28  
29

## 30 283 **Acknowledgements**

31  
32  
33 284 The authors would like to acknowledge all the study participants and field enumerators for their  
34  
35 285 invaluable support. We further acknowledge the Steering Committee members and the Technical  
36  
37 286 Working Group members who guided the study. We sincerely acknowledge the support of  
38  
39 287 Matilda Nash from Abt Britain in reviewing and copyediting the manuscript.  
40  
41  
42  
43

44 288 **Author's contributions** KBK, KKA and MD conceived the study. NG and DKC helped in data  
45  
46 289 entry and management. KKA and NS was involved in conducting data analysis. NS, KKA, AP and  
47  
48 290 NKM wrote the manuscript. PG and AKJ supported in monitoring overall data quality. All authors  
49  
50 291 reviewed the manuscript. NS and KBK contributed equally.  
51  
52  
53  
54  
55  
56  
57  
58  
59  
60



292 **Funding statement** The authors have not received specific grant from any agency for this  
293 research.

294 **Competing interest** The authors declare no conflict of interest.

295 **Patient consent for publication** Not required.

296 **Data sharing statement** Data will be made available on request.

297 **Word count** 3498

298

## 299 REFERENCES

- 300 1. Saeedi P, Petersohn I, Salpea P, Malanda B, Karuranga S, Unwin N, et al. Global and  
301 regional diabetes prevalence estimates for 2019 and projections for 2030 and 2045: Results from  
302 the International Diabetes Federation Diabetes Atlas. *Diabetes research and clinical practice*.  
303 2019;157:107843.
- 304 2. Diabetes [Internet]. 2021 [cited 28 September 2021]. Available from:  
305 <https://www.who.int/news-room/fact-sheets/detail/diabetes>.
- 306 3. IDF. Diabetes facts & figures 2017 [cited 2019]. Available from:  
307 <https://www.idf.org/aboutdiabetes/what-is-diabetes/facts-figures.html>.
- 308 4. WHO. Global report on diabetes. 2016.
- 309 5. Hills AP, Arena R, Khunti K, Yajnik CS, Jayawardena R, Henry CJ, et al. Epidemiology and  
310 determinants of type 2 diabetes in south Asia. *The Lancet Diabetes & Endocrinology*. 2018.

- 1  
2  
3 311 6. IDF. IDF South-East Asia 2017 [cited 2019]. Available from: <https://idf.org/our->  
4  
5  
6 312 [network/regions-members/south-east-asia/welcome.html](https://idf.org/our-network/regions-members/south-east-asia/welcome.html).  
7  
8 313 7. IDF. Nepal Country report 2017 & 2045. Available from:  
9  
10 314 <https://reports.instantatlas.com/report/view/704ee0e6475b4af885051bcec15f0e2c/NPL>.  
11  
12  
13 315 8. Gyawali B, Sharma R, Neupane D, Mishra SR, van Teijlingen E, Kallestrup P. Prevalence of  
14  
15 316 type 2 diabetes in Nepal: a systematic review and meta-analysis from 2000 to 2014. *Global health*  
16  
17 317 *action*. 2015;8(1):29088.  
18  
19  
20 318 9. Gyawali B, Hansen MRH, Povlsen MB, Neupane D, Andersen PK, McLachlan CS, et al.  
21  
22 319 Awareness, prevalence, treatment, and control of type 2 diabetes in a semi-urban area of Nepal:  
23  
24 320 Findings from a cross-sectional study conducted as a part of COBIN-D trial. *PloS one*.  
25  
26 321 2018;13(11):e0206491.  
27  
28  
29  
30 322 10. Gyawali B, Ferrario A, Van Teijlingen E, Kallestrup P. Challenges in diabetes mellitus type  
31  
32 323 2 management in Nepal: a literature review. *Global health action*. 2016;9(1):31704.  
33  
34  
35 324 11. Shakya B, Shrestha N, Shrestha S. An Epidemiological Study of Diabetes Mellitus in  
36  
37 325 Productive Aged Urban Nepalese of Makalbari Area of Gokarneshwor Municipality. *Nepal*  
38  
39 326 *Medical College Journal*. 2020;22(3):173-80.  
40  
41  
42 327 12. Rajbhandari B, Hyoju SP, Poudel L, Adhikari A, Rijal B, Joshi P. Prevalence of Type 2  
43  
44 328 Diabetes among Patients Visiting Nepal Police Hospital in Kathmandu: A Descriptive Cross-  
45  
46 329 sectional Study. *JNMA: Journal of the Nepal Medical Association*. 2021;59(233):42.  
47  
48  
49 330 13. Aryal KK, Mehata S, Neupane S, Vaidya A, Dhimal M, Dhakal P, et al. The burden and  
50  
51 331 determinants of non communicable diseases risk factors in Nepal: findings from a nationwide  
52  
53 332 STEPS survey. *PloS one*. 2015;10(8):e0134834.  
54  
55  
56  
57  
58  
59  
60

- 1  
2  
3 333 14. NHRC. Population Based Prevalence of Selected Non-Communicable Diseases in Nepal.  
4  
5  
6 334 Kathmandu, Nepal: Nepal Health Research Council, Government of Nepal, 2019.  
7  
8 335 15. Karki KB, Thapa P, Dhimal M, Bista B, Joshi A, Poudyal A, et al. Anemia and its  
9  
10 336 Determinants among Women of Reproductive Age in Mid-Western Tarai of Nepal, 2015.  
11  
12  
13 337 Kathmandu, Nepal: Nepal Health Research Council, 2016.  
14  
15 338 16. Karki KB, Aryal KK, Dhimal M, Mehta S, Pandey AR, Bista B, et al. Community Based  
16  
17  
18 339 Intervention for Prevention and Control of NCD Risk Factors (CIPCON). Kathmandu, Nepal: 2017.  
19  
20 340 17. Thapa N, Aryal KK, Puri R, Shrestha S, Shrestha S, Thapa P, et al. Alcohol consumption  
21  
22  
23 341 practices among married women of reproductive age in Nepal: a population based household  
24  
25 342 survey. PloS one. 2016;11(4):e0152535.  
26  
27  
28 343 18. Association AD. Diagnosis and classification of diabetes mellitus. Diabetes care.  
29  
30 344 2010;33(Supplement 1):S62-S9.  
31  
32  
33 345 19. Aryal KK. Non communicable diseases risk factors: STEPS Survey Nepal 2013: Nepal Health  
34  
35 346 Research Council (NHRC); 2014.  
36  
37  
38 347 20. Basit A, Fawwad A, Qureshi H, Shera A. Prevalence of diabetes, pre-diabetes and  
39  
40 348 associated risk factors: second National Diabetes Survey of Pakistan (NDSP), 2016–2017. BMJ  
41  
42 349 open. 2018;8(8):e020961.  
43  
44  
45 350 21. Dhimal M, Bista B, Bhattarai S, Dixit LP, Hyder MKA, Agrawal N, et al. Report of Non  
46  
47 351 Communicable Disease Risk Factors: STEPS Survey Nepal 2019. Kathmandu: Nepal Health  
48  
49 352 Research Council, 2020.  
50  
51  
52 353 22. IDF. Diabetes in South-East Asia 2017 [cited 2019]. Available from:  
53  
54 354 <https://www.idf.org/our-network/regions-members/south-east-asia/diabetes-in-sea.html>.

- 1  
2  
3 355 23. WHO. Diabetes country profile:Nepal 2016. Available from:  
4  
5  
6 356 [https://www.who.int/diabetes/country-profiles/npl\\_en.pdf](https://www.who.int/diabetes/country-profiles/npl_en.pdf).  
7  
8 357 24. GBD Compare [Internet]. IHME, University of Washington. 2019 [cited 9 October 2021].  
9  
10 358 Available from: <http://vizhub.healthdata.org/gbd-compare>.  
11  
12  
13 359 25. WHO. Diabetes 2019 [cited 2019]. Available from:  
14  
15 360 [http://www.searo.who.int/india/topics/diabetes\\_mellitus/en/](http://www.searo.who.int/india/topics/diabetes_mellitus/en/).  
16  
17  
18 361 26. IDF. IDF Western Pacific members 2017 [cited 2019]. Available from:  
19  
20 362 <https://www.idf.org/our-network/regions-members/western-pacific/members/101-china.html>.  
21  
22  
23 363 27. Akter S, Rahman MM, Abe SK, Sultana P. Prevalence of diabetes and prediabetes and their  
24  
25 364 risk factors among Bangladeshi adults: a nationwide survey. Bulletin of the World Health  
26  
27 365 Organization. 2014;92:204-13A.  
28  
29  
30 366 28. CDC. National Diabetes Statistics Report. 2017.  
31  
32  
33 367 29. Liu J, Zhao D, Liu J, Qi Y, Sun J, Wang W. Prevalence of diabetes mellitus in outpatients  
34  
35 368 with essential hypertension in China: a cross-sectional study. BMJ open. 2013;3(11):e003798.  
36  
37  
38 369 30. Uloko AE, Musa BM, Ramalan MA, Gezawa ID, Puepet FH, Uloko AT, et al. Prevalence and  
39  
40 370 risk factors for diabetes mellitus in Nigeria: a systematic review and meta-analysis. Diabetes  
41  
42 371 Therapy. 2018;9(3):1307-16.  
43  
44  
45 372 31. Nepal [Internet]. 2020 [cited 9 October 2021]. Available from:  
46  
47 373 <https://knoema.com/atlas/Nepal/Population-aged-65-years-and-above>.  
48  
49  
50 374 32. Aryal GR. The Status of Elderly People in Nepal. Patan Pragya. 2019;5(1):11-8.  
51  
52 375 33. Shou J, Chen P-J, Xiao W-H. Mechanism of increased risk of insulin resistance in aging  
53  
54 376 skeletal muscle. Diabetology & metabolic syndrome. 2020;12(1):1-10.  
55  
56  
57  
58  
59  
60

- 1  
2  
3 377 34. Jayawardena R, Ranasinghe P, Byrne NM, Soares MJ, Katulanda P, Hills AP. Prevalence  
4  
5 378 and trends of the diabetes epidemic in South Asia: a systematic review and meta-analysis. BMC  
6  
7 379 public health. 2012;12(1):380.  
8  
9  
10 380 35. Nordström\* A, Hadrévi J, Olsson T, Franks PW, Nordström P. Higher prevalence of type 2  
11  
12 381 diabetes in men than in women is associated with differences in visceral fat mass. The Journal of  
13  
14 382 Clinical Endocrinology & Metabolism. 2016;101(10):3740-6.  
15  
16  
17 383 36. Arnetz L, Ekberg NR, Alvarsson M. Sex differences in type 2 diabetes: focus on disease  
18  
19 384 course and outcomes. Diabetes, metabolic syndrome and obesity: targets and therapy.  
20  
21 385 2014;7:409.  
22  
23  
24 386 37. Nepal: Degree of urbanization from 2010 to 2020 [Internet]. 2021 [cited 9 October 2021].  
25  
26 387 Available from: <https://www.statista.com/statistics/422620/urbanization-in-nepal/>.  
27  
28  
29 388 38. Dhimal M, Bista B, Bhattarai S, Dixit LP, Hyder MKA, Agrawal N, et al. Report of Non  
30  
31 389 Communicable Disease Risk Factors: STEPS Survey Nepal 2019. Kathmandu, Nepal: Nepal Health  
32  
33 390 Research Council, 2020.  
34  
35  
36 391 39. The prevalence of diabetes in the people 20 years and above. 2016.  
37  
38  
39 392 40. Editorial. Epidemic of Diabetes in urban Nepal-time to act. Journal of Nepal Medical  
40  
41 393 Association. 2003.  
42  
43  
44 394 41. Aung WP, Htet AS, Bjertness E, Stigum H, Chongsuvivatwong V, Kjøllesdal MKR. Urban–  
45  
46 395 rural differences in the prevalence of diabetes mellitus among 25–74 year-old adults of the  
47  
48 396 Yangon Region, Myanmar: two cross-sectional studies. BMJ open. 2018;8(3):e020406.  
49  
50  
51  
52  
53  
54  
55  
56  
57  
58  
59  
60

- 1  
2  
3 397 42. Alam DS, Talukder SH, Chowdhury MAH, Siddiquee AT, Ahmed S, Pervin S, et al.  
4  
5  
6 398 Overweight and abdominal obesity as determinants of undiagnosed diabetes and pre-diabetes  
7  
8 399 in Bangladesh. *BMC obesity*. 2016;3(1):19.  
9  
10 400 43. Asmelash D, Asmelash Y. The Burden of Undiagnosed Diabetes Mellitus in Adult African  
11  
12 401 Population: A Systematic Review and Meta-Analysis. *Journal of diabetes research*. 2019;2019.  
13  
14  
15 402 44. Aynalem SB, Zeleke AJ. Prevalence of diabetes mellitus and its risk factors among  
16  
17 403 individuals aged 15 years and above in Mizan-Aman town, Southwest Ethiopia, 2016: a cross  
18  
19 404 sectional study. *International journal of endocrinology*. 2018;2018.  
20  
21  
22 405 45. Dhungana RR, Pandey AR, Shrestha N. Trends in the Prevalence, Awareness, Treatment,  
23  
24 406 and Control of Hypertension in Nepal between 2000 and 2025: A Systematic Review and Meta-  
25  
26 407 Analysis. *International journal of hypertension*. 2021;2021.  
27  
28  
29 408 46. Worede A, Alemu S, Gelaw YA, Abebe M. The prevalence of impaired fasting glucose and  
30  
31 409 undiagnosed diabetes mellitus and associated risk factors among adults living in a rural Koladiba  
32  
33 410 town, northwest Ethiopia. *BMC research notes*. 2017;10(1):251.  
34  
35  
36 411 47. Babu GR, Murthy G, Ana Y, Patel P, Deepa R, Neelon SEB, et al. Association of obesity with  
37  
38 412 hypertension and type 2 diabetes mellitus in India: A meta-analysis of observational studies.  
39  
40 413 *World journal of diabetes*. 2018;9(1):40.  
41  
42  
43 414 48. Conway BN, Han X, Munro HM, Gross AL, Shu X-O, Hargreaves MK, et al. The obesity  
44  
45 415 epidemic and rising diabetes incidence in a low-income racially diverse southern US cohort. *PLoS*  
46  
47 416 *one*. 2018;13(1):e0190993.  
48  
49  
50  
51  
52  
53  
54  
55  
56  
57  
58  
59  
60

- 1  
2  
3 417 49. Shah A, Parthasarathi D, Sarkar D, Saha C. A comparative study of body mass index (BMI)  
4  
5  
6 418 in diabetic and non-diabetic individuals in Nepalese population. Kathmandu University medical  
7  
8 419 journal (KUMJ). 2006;4(1):4-10.  
9  
10  
11 420 50. Rana K, Ghimire P, Chimoriya R, Chimoriya R. Trends in the Prevalence of Overweight and  
12  
13 421 Obesity and Associated Socioeconomic and Household Environmental Factors among Women in  
14  
15 422 Nepal: Findings from the Nepal Demographic and Health Surveys. *Obesities*. 2021;1(2):113-35.  
16  
17  
18 423 51. Bhowmik B, Siddiquee T, Mujumder A, Afsana F, Ahmed T, Mdala I, et al. Serum lipid  
19  
20 424 profile and its association with diabetes and prediabetes in a rural Bangladeshi population.  
21  
22 425 *International journal of environmental research and public health*. 2018;15(9):1944.  
23  
24  
25 426 52. Cui J, Sun J, Wang W, Xin H, Qiao Q, Baloch Z, et al. The association of triglycerides and  
26  
27 427 total cholesterol concentrations with newly diagnosed diabetes in adults in china. *Oncotarget*.  
28  
29 428 2017;8(61):103477.  
30  
31  
32 429 53. Thapa SD, KC SR, Gautam S, Gyawali D. Dyslipidemia in type 2 diabetes mellitus. *Journal*  
33  
34 430 *of pathology of Nepal*. 2017;7(2):1149-54.  
35  
36  
37 431 54. Pokhrel S, Shrestha S, Timilsina A, Sapkota M, Bhatt MP, Pardhe BD. Self-care adherence  
38  
39 432 and barriers to good glycaemic control in Nepalese type 2 diabetes mellitus patients: a hospital-  
40  
41 433 based cross-sectional study. *Journal of multidisciplinary healthcare*. 2019;12:817.  
42  
43  
44 434 55. Parajuli H, Shakya J, Pardhe BD, Khanal PR, Parajuli NP, Maharjan P, et al. Elevated serum  
45  
46 435 uric acid and triglycerides level in the patients with Type II Diabetes Mellitus-a Nepalese case  
47  
48 436 control study. *Annals of Clinical Chemistry and Laboratory Medicine*. 2016;2(2):26-34.  
49  
50  
51  
52  
53  
54  
55  
56  
57  
58  
59  
60

- 1  
2  
3 437 56. Hjerkind KV, Stenehjem JS, Nilsen TI. Adiposity, physical activity and risk of diabetes  
4  
5  
6 438 mellitus: prospective data from the population-based HUNT study, Norway. *BMJ open*.  
7  
8 439 2017;7(1):e013142.  
9  
10 440 57. Jannasch F, Kröger J, Schulze MB. Dietary patterns and type 2 diabetes: a systematic  
11  
12  
13 441 literature review and meta-analysis of prospective studies. *The Journal of nutrition*.  
14  
15 442 2017;147(6):1174-82.  
16  
17  
18 443 58. Sami W, Ansari T, Butt NS, Ab Hamid MR. Effect of diet on type 2 diabetes mellitus: A  
19  
20 444 review. *International journal of health sciences*. 2017;11(2):65.  
21  
22  
23 445 59. Wei M, Schwertner HA, Blair SN. The association between physical activity, physical  
24  
25 446 fitness, and type 2 diabetes mellitus. *Comprehensive therapy*. 2000;26(3):176-82.  
26  
27

28 447

30 448

32 449



STROBE Statement—Checklist of items that should be included in reports of *cross-sectional studies*

|                              | Item No | Recommendation                                                                                                                                                                                               | Page No  |
|------------------------------|---------|--------------------------------------------------------------------------------------------------------------------------------------------------------------------------------------------------------------|----------|
| <b>Title and abstract</b>    | 1       | (a) Indicate the study's design with a commonly used term in the title or the abstract                                                                                                                       | 2        |
|                              |         | (b) Provide in the abstract an informative and balanced summary of what was done and what was found                                                                                                          | 2,3      |
| <b>Introduction</b>          |         |                                                                                                                                                                                                              |          |
| Background/rationale         | 2       | Explain the scientific background and rationale for the investigation being reported                                                                                                                         | 4,5      |
| Objectives                   | 3       | State specific objectives, including any prespecified hypotheses                                                                                                                                             | 5        |
| <b>Methods</b>               |         |                                                                                                                                                                                                              |          |
| Study design                 | 4       | Present key elements of study design early in the paper                                                                                                                                                      | 5        |
| Setting                      | 5       | Describe the setting, locations, and relevant dates, including periods of recruitment, exposure, follow-up, and data collection                                                                              | 5        |
| Participants                 | 6       | (a) Give the eligibility criteria, and the sources and methods of selection of participants                                                                                                                  | 5        |
| Variables                    | 7       | Clearly define all outcomes, exposures, predictors, potential confounders, and effect modifiers. Give diagnostic criteria, if applicable                                                                     | 6, 7     |
| Data sources/<br>measurement | 8*      | For each variable of interest, give sources of data and details of methods of assessment (measurement). Describe comparability of assessment methods if there is more than one group                         | 7        |
| Bias                         | 9       | Describe any efforts to address potential sources of bias                                                                                                                                                    | N/A      |
| Study size                   | 10      | Explain how the study size was arrived at                                                                                                                                                                    | 5        |
| Quantitative variables       | 11      | Explain how quantitative variables were handled in the analyses. If applicable, describe which groupings were chosen and why                                                                                 | 6, 7     |
| Statistical methods          | 12      | (a) Describe all statistical methods, including those used to control for confounding                                                                                                                        | 7        |
|                              |         | (b) Describe any methods used to examine subgroups and interactions                                                                                                                                          | 7        |
|                              |         | (c) Explain how missing data were addressed                                                                                                                                                                  | 7        |
|                              |         | (d) If applicable, describe analytical methods taking account of sampling strategy                                                                                                                           | 7        |
|                              |         | (e) Describe any sensitivity analyses                                                                                                                                                                        | N/A      |
| <b>Results</b>               |         |                                                                                                                                                                                                              |          |
| Participants                 | 13*     | (a) Report numbers of individuals at each stage of study—eg numbers potentially eligible, examined for eligibility, confirmed eligible, included in the study, completing follow-up, and analysed            | 5        |
|                              |         | (b) Give reasons for non-participation at each stage                                                                                                                                                         | N/A      |
|                              |         | (c) Consider use of a flow diagram                                                                                                                                                                           | N/A      |
| Descriptive data             | 14*     | (a) Give characteristics of study participants (eg demographic, clinical, social) and information on exposures and potential confounders                                                                     | 8 to 10  |
|                              |         | (b) Indicate number of participants with missing data for each variable of interest                                                                                                                          | 11       |
| Outcome data                 | 15*     | Report numbers of outcome events or summary measures                                                                                                                                                         | 12       |
| Main results                 | 16      | (a) Give unadjusted estimates and, if applicable, confounder-adjusted estimates and their precision (eg, 95% confidence interval). Make clear which confounders were adjusted for and why they were included | 12 to 16 |

|                          |    |                                                                                                                                                                            |          |
|--------------------------|----|----------------------------------------------------------------------------------------------------------------------------------------------------------------------------|----------|
|                          |    | (b) Report category boundaries when continuous variables were categorized                                                                                                  | N/A      |
|                          |    | (c) If relevant, consider translating estimates of relative risk into absolute risk for a meaningful time period                                                           | N/A      |
| Other analyses           | 17 | Report other analyses done—eg analyses of subgroups and interactions, and sensitivity analyses                                                                             | N/A      |
| <b>Discussion</b>        |    |                                                                                                                                                                            |          |
| Key results              | 18 | Summarise key results with reference to study objectives                                                                                                                   | 8 to 16  |
| Limitations              | 19 | Discuss limitations of the study, taking into account sources of potential bias or imprecision. Discuss both direction and magnitude of any potential bias                 | 20       |
| Interpretation           | 20 | Give a cautious overall interpretation of results considering objectives, limitations, multiplicity of analyses, results from similar studies, and other relevant evidence | 16 to 20 |
| Generalisability         | 21 | Discuss the generalisability (external validity) of the study results                                                                                                      | 20       |
| <b>Other information</b> |    |                                                                                                                                                                            |          |
| Funding                  | 22 | Give the source of funding and the role of the funders for the present study and, if applicable, for the original study on which the present article is based              | 22       |

\*Give information separately for exposed and unexposed groups.

**Note:** An Explanation and Elaboration article discusses each checklist item and gives methodological background and published examples of transparent reporting. The STROBE checklist is best used in conjunction with this article (freely available on the Web sites of PLoS Medicine at <http://www.plosmedicine.org/>, Annals of Internal Medicine at <http://www.annals.org/>, and Epidemiology at <http://www.epidem.com/>). Information on the STROBE Initiative is available at [www.strobe-statement.org](http://www.strobe-statement.org).

# BMJ Open

## Prevalence of Diabetes Mellitus and Associated Risk Factors in Nepal: Findings from A Nationwide Population-Based Survey

|                                 |                                                                                                                                                                                                                                                                                                                                                                                                                                                                                                                                     |
|---------------------------------|-------------------------------------------------------------------------------------------------------------------------------------------------------------------------------------------------------------------------------------------------------------------------------------------------------------------------------------------------------------------------------------------------------------------------------------------------------------------------------------------------------------------------------------|
| Journal:                        | <i>BMJ Open</i>                                                                                                                                                                                                                                                                                                                                                                                                                                                                                                                     |
| Manuscript ID                   | bmjopen-2022-060750.R1                                                                                                                                                                                                                                                                                                                                                                                                                                                                                                              |
| Article Type:                   | Original research                                                                                                                                                                                                                                                                                                                                                                                                                                                                                                                   |
| Date Submitted by the Author:   | 28-Jan-2022                                                                                                                                                                                                                                                                                                                                                                                                                                                                                                                         |
| Complete List of Authors:       | Shrestha, Namuna; Nepal Health Research Council<br>Karki, Khem; Ministry of Health and Population<br>Poudyal, Anil; Nepal Health Research Council<br>Aryal , KK; Nepal Health Research Council, Research Section<br>Mahato, Namra ; Nepal Health Research Council<br>Gautam, Nitisha; Nepal Health Research Council<br>K.C., Dirghayu; Nepal Health Research Council, Research<br>Gyanwali, Pradip ; Nepal Health Research Council<br>Dhimal, Meghnath; Nepal Health Research Council<br>Jha, Anjani; Nepal Health Research Council |
| <b>Primary Subject Heading</b>: | Diabetes and endocrinology                                                                                                                                                                                                                                                                                                                                                                                                                                                                                                          |
| Secondary Subject Heading:      | Diabetes and endocrinology, Public health                                                                                                                                                                                                                                                                                                                                                                                                                                                                                           |
| Keywords:                       | DIABETES & ENDOCRINOLOGY, PREVENTIVE MEDICINE, PUBLIC HEALTH                                                                                                                                                                                                                                                                                                                                                                                                                                                                        |
|                                 |                                                                                                                                                                                                                                                                                                                                                                                                                                                                                                                                     |

SCHOLARONE™  
Manuscripts



I, the Submitting Author has the right to grant and does grant on behalf of all authors of the Work (as defined in the below author licence), an exclusive licence and/or a non-exclusive licence for contributions from authors who are: i) UK Crown employees; ii) where BMJ has agreed a CC-BY licence shall apply, and/or iii) in accordance with the terms applicable for US Federal Government officers or employees acting as part of their official duties; on a worldwide, perpetual, irrevocable, royalty-free basis to BMJ Publishing Group Ltd ("BMJ") its licensees and where the relevant Journal is co-owned by BMJ to the co-owners of the Journal, to publish the Work in this journal and any other BMJ products and to exploit all rights, as set out in our [licence](#).

The Submitting Author accepts and understands that any supply made under these terms is made by BMJ to the Submitting Author unless you are acting as an employee on behalf of your employer or a postgraduate student of an affiliated institution which is paying any applicable article publishing charge ("APC") for Open Access articles. Where the Submitting Author wishes to make the Work available on an Open Access basis (and intends to pay the relevant APC), the terms of reuse of such Open Access shall be governed by a Creative Commons licence – details of these licences and which [Creative Commons](#) licence will apply to this Work are set out in our licence referred to above.

Other than as permitted in any relevant BMJ Author's Self Archiving Policies, I confirm this Work has not been accepted for publication elsewhere, is not being considered for publication elsewhere and does not duplicate material already published. I confirm all authors consent to publication of this Work and authorise the granting of this licence.

1  
2  
3 **1 Prevalence of Diabetes Mellitus and Associated Risk Factors in Nepal: Findings from A**  
4  
5  
6 **2 Nationwide Population-Based Survey**  
7

8 Namuna Shrestha<sup>1#\*</sup>, Khem Bahadur Karki<sup>2#</sup>, Anil Poudyal<sup>1</sup>, Krishna Kumar Aryal<sup>3</sup>, Namra Kumar  
9  
10 Mahato<sup>1</sup>, Nitisha Gautam<sup>1</sup>, Dirghayu K.C.<sup>1</sup>, Pradip Gyanwali<sup>1</sup>, Meghnath Dhimal<sup>1</sup>, Anjani Kumar  
11  
12  
13 Jha<sup>1</sup>  
14  
15

16 <sup>1</sup>Nepal Health Research Council, Ramshah Path, Kathmandu, Nepal  
17

18  
19 <sup>2</sup>Department of Community Medicine, Maharajgunj Medical Campus, Kathmandu, Nepal  
20  
21

22 <sup>3</sup>Monitoring, Evaluation and Operational Research (MEOR) Project, Abt Associates, Kathmandu,  
23  
24  
25 Nepal  
26  
27

28  
29  
30  
31  
32  
33  
34  
35  
36  
37  
38  
39  
40  
41  
42  
43  
44  
45  
46  
47  
48  
49  
50  
51  
52  
53  
54  
55  
56  
57  
58  
59  
60

11 \*Corresponding author: Namuna Shrestha, [namunashrestha12@gmail.com](mailto:namunashrestha12@gmail.com)

12 #Equal contributions

## 14 ABSTRACT

15 **Objectives** The burden of diabetes mellitus (DM) has increased globally, particularly in low-and  
16 middle-income countries, including Nepal. Population-based nationally representative data on  
17 the prevalence of DM is limited. This paper presents the prevalence of DM and its associated risk  
18 factors in Nepal.

19 **Research designs and methods** This population-based study sampled 13,200 participants aged  
20 20 years and above in 400 clusters of 72 districts of Nepal. The study used a standardised  
21 questionnaire adapted from the World Health Organization STEPwise approach to non-  
22 communicable disease risk factor surveillance instrument and digitalised in Android-compatible  
23 mobile phones. Fasting and two hours postprandial blood samples were taken to test various  
24 biochemical parameters. Descriptive followed by multivariate analyses were done to assess the  
25 association between explanatory variables and the outcome variable.

26 **Primary outcome measures** Prevalence of DM

27 **Results** The prevalence of DM was found to be 8.5% (95%CI:7.8-9.3). The odds of DM occurrence  
28 was higher in the upper age groups [40-59 years at adjusted odds ratio (AOR) 3.1(95%CI:2.3-4.2)  
29 and 60+ years at AOR 4.7(95%CI3.3-6.6)], compared to the group aged 20-39 years. Men were  
30 found to have higher odds of DM (AOR:1.3, 95%CI:1.1-1.6) compared to women. Urban residents  
31 had almost twice higher odds of DM (AOR:1.7, 95%CI:1.4-2.2) compared to rural residents.  
32 Participants with raised blood pressure (BP) (AOR: 2.2, 95% CI:1.8-2.7), those who were  
33 overweight and obese (AOR: 2.0, 95%CI:1.6-2.4) and those who had high triglyceride level

1  
2  
3 34 ( $\geq 150$ mg/dl) (AOR: 2.1, 95% CI: 1.8-2.6) also had twice higher odds of DM compared to those  
4  
5  
6 35 with normal BP, an average body mass index (BMI) and normal triglyceride level respectively.  
7

8  
9 36 **Conclusions** Targeted interventions to higher risk groups as well as prevention and control of  
10  
11 37 other associated biological risk factors might help to reduce the prevalence of DM in Nepal.  
12  
13

14 38

### 17 39 **Strengths and limitations of the study**

- 18  
19  
20  
21 40 • The study included a large sample spread across 400 clusters (wards-lowest  
22  
23 41 administrative units) covering 72 districts out of 77 districts in Nepal.  
24  
25  
26 42 • Blood glucose was measured through both fasting and post-prandial blood sample.  
27  
28  
29 43 • The study used digital data collection and feedback was given on a regular basis after data  
30  
31 44 were uploaded on a real time basis.  
32  
33  
34 45 • Data quality was ensured through standard training processes and quality assurance  
35  
36  
37 46 procedures.  
38  
39  
40 47 • The study does not have information on the physical activity and dietary habits of  
41  
42 48 participants, which are known to be important predictors of DM.  
43  
44  
45  
46  
47  
48  
49  
50  
51  
52  
53  
54  
55  
56  
57  
58  
59  
60

## 50 INTRODUCTION

51 The burden of diabetes mellitus (DM) has increased globally. In 2019, approximately 463 million  
52 adults aged 20-79 years were living with diabetes worldwide(1), causing an estimated 1.5 million  
53 deaths(2). This number is expected to rise to 700 million by 2045(1) DM contributes to at  
54 least USD 727 billion in health expenses, with 12% of total spending on adults(3). The burden of  
55 DM in terms of prevalence and number has risen dramatically, particularly in low- and middle-  
56 income countries (LMICs)(4).

57 The prevalence of DM and related risk factors, including overweight and obesity, have increased  
58 across South Asia in recent decades(5). According to the International Diabetes Federation (IDF),  
59 an estimated 82 million adults aged 20-79 years were living with DM in the South East Asia Region  
60 (SEAR) in 2017, representing a regional prevalence of 8.5%(6). Factors like decline in nutrition  
61 quality, reduction in physical activity, and increase in sedentary behaviours are reflected in the  
62 increasing prevalence of type 2 diabetes and related risk factors in the region(5).The IDF reported  
63 the national prevalence of DM among people 20-79 years in Nepal to be 4% in 2017, which is  
64 expected to rise to 6.1% by 2045. In the same age group, 11.7% of total deaths were attributed  
65 to DM in Nepal(7). A systematic review carried out in 2014 showed a pooled prevalence of DM  
66 as 8.4%, with the variation in prevalence ranging from 1.4% to 19.0% in Nepal(8). Even though,  
67 there are several national estimates available on the prevalence of DM in Nepal(9-12), those  
68 studies were limited to small sample size or geographic location that would not be representative  
69 of the whole population in Nepal. In addition, criteria used for defining the prevalence of DM  
70 varied across studies. Furthermore, there is a lack of research identifying the predictors of type



1  
2  
3 71 2 diabetes in Nepal(9). This warrants a large scale study that is representative of the whole  
4  
5  
6 72 population, which provides a national (including subnational) prevalence of type 2 diabetes using  
7  
8 73 standard criteria and identifies its predictors.  
9

10  
11 74 This study reports the first nationally representative population-based prevalence of DM  
12  
13 75 measured through both fasting and postprandial (PP) blood sample including that in different  
14  
15  
16 76 sub-groups and factors associated with occurrence of DM in Nepal.  
17

## 18 19 77 **METHODS**

20  
21  
22 78 A population based cross sectional study was conducted covering all seven provinces of Nepal  
23  
24  
25 79 from 2016 to 2018. The sample size was calculated by considering the prevalence of raised blood  
26  
27  
28 80 glucose ( $p=4\%$ ) from the 2013 non-communicable diseases (NCD) risk factors STEPS survey,  
29  
30 81 Nepal(13). Ethical approval was sought from the Ethical Review Board(ERB) of the Nepal Health  
31  
32 82 Research Council (NHRC) with registration number 110/2016. Written informed consent was  
33  
34  
35 83 taken separately from the participants for physical measurements and laboratory tests. The study  
36  
37 84 was carried out among 13,200 participants aged 20 years and above using multistage cluster  
38  
39  
40 85 sampling technique. Men and women not providing consent to participate in either or both  
41  
42 86 stages of the study (questionnaire and physical measurements, or biochemical measurements)  
43  
44  
45 87 were excluded from that particular stage or both the stages depending upon the consent  
46  
47 88 received. Detail methodology for this study has been explained elsewhere(14).  
48  
49

## 50 89 **Data collection**

51  
52  
53 90 Data collection was done in two steps: first as face-to-face interview with a questionnaire and as  
54  
55  
56 91 second step physical measurements and collection of blood sample of the same participant with  
57

1  
2  
3 92 the prior appointments. Additional details on data collection such as orientation of field team has  
4  
5  
6 93 been explained previously(14). REMO-Research and Monitoring Software, was used to  
7  
8 94 programme the questionnaires into the mobile phones. This software was developed by Rooster  
9  
10 95 Logic, an Information and Communication Technology (ICT) company led by local engineers with  
11  
12  
13 96 focus on database creation and management, research, and monitoring. This software has been  
14  
15 97 extensively used for digital data collection in Nepal and allows small to large scale research  
16  
17  
18 98 projects to be conducted with ease and enables real-time monitoring of data. This software has  
19  
20 99 been used by the NHRC in various previous surveys(15, 16).  
21  
22

## 23 100 **Socio-demographic and behavioural information**

24  
25  
26 101 Information on socio-demographic and behavioural risk factors was collected through face-to-  
27  
28  
29 102 face interviews using an interviewer-administered questionnaire. Information was collected on  
30  
31 103 age, sex, ethnicity, educational status, marital status, occupation type, history of raised blood  
32  
33  
34 104 pressure and DM, alcohol consumption, and smoking habits. The commonly used classification  
35  
36 105 for ethnicity in Nepal has six categories: 1) Dalit (marginalized group of people, with relatively  
37  
38  
39 106 lower socio-economic and education status); 2) Disadvantaged Janajatis (disadvantaged group of  
40  
41 107 people and also indigenous, with relatively lower socio-economic and education status); 3)  
42  
43  
44 108 Disadvantaged non Dalit Terai Caste Groups (disadvantaged group of people from the Terai, the  
45  
46 109 lowlands, with relatively lower socio-economic and education status but not the dalit groups); 4)  
47  
48  
49 110 Religious Minorities (Muslim, Christian, etc.); 5) Relatively advantaged Janajatis (indigenous  
50  
51 111 group of people with relatively higher socio-economic status, such as Newar, Thakali, and  
52  
53  
54 112 Gurung); and 6) Upper Caste Groups (population with relatively higher socio-economic and  
55  
56 113 education status, mostly Brahmins, Chhetris, and Thakuri)(17).  
57  
58  
59  
60

1  
2  
3 114 Data on part of physical measurements, blood pressure measurement, and biochemical  
4  
5  
6 115 measurement was done using respective equipment and procedures, and the detail including the  
7  
8 116 information on quality control has been explained elsewhere(14). Participants were defined as  
9  
10  
11 117 having DM if they had raised fasting glucose ( $\geq 126$ mg) or raised PP blood glucose level ( $\geq 200$ mg),  
12  
13 118 or if the participants were on anti-diabetic medication at the time of the study(18, 19) whereas  
14  
15 119 the key definition of the terms raised blood pressure, body mass index, tobacco use, and alcohol  
16  
17  
18 120 consumption has been explained in the report published previously (14).  
19  
20

## 21 121 **Data management and analysis**

22  
23  
24 122 Data was extracted by the core team involved in data management, from the server where the  
25  
26  
27 123 collected data was stored. Data cleaning was performed using IBM SPSS® Statistics software  
28  
29  
30 124 version 20.0 (IBM, U.S.A.). The cleaned data was then exported to Stata® version 13.0 for analysis  
31  
32 125 (Stata Corp, U.S.A.). Descriptive results were produced for each of the outcome variables using  
33  
34 126 complex sample analysis considering the PSUs, strata and weight. Bivariate and multivariate  
35  
36  
37 127 analyses were used to assess the association between explanatory variables and the outcome  
38  
39 128 variable. All explanatory variables with  $p$ -value of  $< 0.05$  in the bivariate analysis were inserted in  
40  
41 129 the multivariate binary logistic regression model to see the independent effect of each variable  
42  
43  
44 130 on the occurrence of DM. The magnitude of the association was measured using the adjusted  
45  
46  
47 131 odds ratio (AOR) and 95% confidence interval (CI). A  $p$ -value  $< 0.05$  was considered as statistically  
48  
49 132 significant(20).  
50  
51  
52  
53  
54  
55  
56  
57  
58  
59  
60

### 133 **Patient and public involvement statement**

134 There was no involvement of patient in the study conception or design. However, experts in the  
135 relevant field were involved from the beginning and regular consultation was done with them.  
136 The findings from the study was disseminated to the general public and concerned stakeholders  
137 through a dissemination program.

## 138 **RESULTS**

139 The following section describes the results. It is divided into a descriptive picture of socio-  
140 demographic, behavioural and biological characteristics, and followed by the factors associated  
141 with the occurrence of DM.

### 142 **Socio-demographic characteristics**

143 Out of the 13,200 targeted participants, 12,557(95.3%) participated in the interview with a  
144 questionnaire (step 1), and 12,148 (92%) participated for the physical measurements and  
145 laboratory investigations (step 2). Socio-demographic characteristics of the participants are  
146 presented in Table 1. Among total of 12,557 participants, the majority of participants (76.8%)  
147 were in the age group 20-59 years. More than half of the participants (57.9%) were female. More  
148 people belonged to the upper caste groups (32.7%), followed by disadvantaged janajatis (20.7%).  
149 More than half (53.1%) were illiterate or never had formal schooling. Geographically, about one-  
150 fourth of the participants were from Bagmati province (24.7%), as it contained the capital city  
151 with dense population with the lowest proportion from Karnali Province (4.8%). More than half  
152 (51.5%) of the participants were urban dwellers.

153 **Table 1: Socio-demographic characteristics of the participants**

| <b>Variables</b> | <b>Characteristics (N=12557)</b>           | <b>N</b>                       | <b>%</b> |
|------------------|--------------------------------------------|--------------------------------|----------|
| <b>Age</b>       | 20-39                                      | 4,562                          | 35.5     |
|                  | 40-59                                      | 5,186                          | 41.3     |
|                  | 60 years and above                         | 2,809                          | 23.3     |
| <b>Sex</b>       | Male                                       | 4,908                          | 42.2     |
|                  | Female                                     | 7,649                          | 57.9     |
| <b>Ethnicity</b> | Upper caste groups                         | 4,263                          | 32.7     |
|                  | Disadvantaged janajatis                    | 2,656                          | 20.7     |
|                  | Relatively advantaged janajatis            | 2,077                          | 17.0     |
|                  | Disadvantaged non-dalit terai caste groups | 1,900                          | 17.0     |
|                  | Dalits                                     | 1,298                          | 9.6      |
|                  | Religious minorities                       | 363                            | 2.9      |
|                  | <b>Education</b>                           | Illiterate/No formal schooling | 6,820    |
|                  | Below secondary (<10 years)                | 2,839                          | 22.3     |
|                  | Secondary and above (≥10 years)            | 2,898                          | 24.6     |
| <b>Province</b>  | Province 1                                 | 2,185                          | 17.6     |
|                  | Province 2                                 | 2,083                          | 18.4     |
|                  | Bagmati Province                           | 3,223                          | 24.7     |

|                           |                       |       |      |
|---------------------------|-----------------------|-------|------|
|                           | Gandaki Province      | 1,337 | 9.6  |
|                           | Province 5            | 2,070 | 15.9 |
|                           | Karnali Province      | 601   | 4.8  |
|                           | Sudurpaschim Province | 1,058 | 9.1  |
| <b>Place of residence</b> | Rural                 | 6,300 | 48.5 |
|                           | Urban                 | 6,257 | 51.5 |

154

## 155 Behavioural and biological characteristics

156 About one third of the participants (31.9%) said that they were smokers. Nearly one fourth of the  
 157 participants (24.6%) reported that they were current alcohol drinkers. Raised blood pressure was  
 158 prevalent among 36.9% of the participants. The proportion of participants who were either  
 159 overweight or obese was 30.7%. More than one-third (35.7%) of participants had raised  
 160 triglycerides. Behavioural and biological characteristics of the participants are presented in Table  
 161 2.

162 **Table 2: Behavioural and biological characteristics of the participants**

| Variables                         | Characteristics (N=12557) | N     | % (95% CI)      |
|-----------------------------------|---------------------------|-------|-----------------|
| <b>Smoking habit</b>              | Smokers                   | 3,955 | 31.9(30.3-33.5) |
|                                   | Non-smoker                | 8,602 | 68.1(66.5-69.7) |
| <b>Users of smokeless tobacco</b> | Users                     | 3,087 | 25.4(24.1-26.8) |

|                                                            |                      |        |                  |
|------------------------------------------------------------|----------------------|--------|------------------|
| <b>products</b>                                            | Non-users            | 9,470  | 74.6(73.3-75.9)  |
| <b>Users of either smoke or smokeless tobacco products</b> | Users                | 1,609  | 13.1(12.2-14.1)  |
|                                                            | Non-users            | 10,948 | 86.9(86.0-87.8)  |
| <b>Alcohol consumption</b>                                 | Yes                  | 3,115  | 24.6(22.98-26.3) |
|                                                            | No                   | 9,442  | 75.4(73.7-77.02) |
| <b>Blood pressure</b>                                      | Raised               | 4,504  | 36.9(35.4-38.5)  |
|                                                            | Normal               | 8,053  | 63.1(61.6-64.6)  |
| <b>Body mass index (N=12,556)</b>                          | Underweight          | 1,534  | 12.3(11.3-13.4)  |
|                                                            | Normal               | 7,156  | 57.0(55.6-58.5)  |
|                                                            | Overweight and obese | 3,866  | 30.7(28.9-32.5)  |
| <b>Increased Waist Hip ratio (N=11,997)</b>                | Increased            | 6,896  | 55.3(53.9-56.7)  |
|                                                            | Normal               | 5,101  | 44.7(43.4-46.1)  |
| <b>Total cholesterol (N=10,861)</b>                        | Raised               | 3,120  | 28.8(27.3-30.4)  |
|                                                            | Normal               | 7,741  | 71.2(69.6-72.7)  |
| <b>Triglyceride (N=10,986)</b>                             | Raised               | 3,862  | 35.7(34.2-37.2)  |
|                                                            | Normal               | 7,124  | 64.3(62.8- 65.9) |

163

## 164 **Factors associated with diabetes mellitus**

165 The overall prevalence of DM was 8.5% (95%CI:7.8-9.3). The following two tables (Table 3 and 4)  
166 show the results on factors associated with DM, along with prevalence of DM among the different  
167 subgroups examined. Table 3, above, shows the prevalence of DM across subgroups by different  
168 background characteristics, and the factors associated with occurrence of DM through  
169 multivariate analysis in terms of AOR. The prevalence of DM is seen to have increased with age.  
170 Participants in the age group of 60 years and above had about 5 times higher odds of having DM  
171 (AOR: 4.7, 95%CI:3.3-6.6) compared to those in the age group of 20 to 39 years. Similarly, male  
172 participants had higher odds of having DM (AOR: 1.3, 95%CI:1.1-1.6) compared to female  
173 participants. Urban residents had about 2 times higher odds of having DM (AOR: 1.7, 95%CI:1.4-  
174 2.2) compared to those residing in rural area. Table 4 above shows the prevalence of DM across  
175 subgroups by different behavioural and biological characteristics and the factors associated with  
176 occurrence of DM through multivariate analysis in terms of AOR. Participants with raised blood  
177 pressure had about 2 times higher odds of having DM compared to those whose blood pressure  
178 was normal (AOR: 2.2, 95% CI: 1.8-2.7). Regarding body mass index, participants who were  
179 overweight and obese had two times higher odds of having DM than those with normal body  
180 mass index (AOR: 2.0, 95% CI: 1.6-2.4). Participants who had high triglyceride level ( $\geq 150$ mg/dl)  
181 had about 2 times higher odds of having DM than their counterparts (AOR: 2.1, 95% CI: 1.8-2.6).

182

183

184



185 **Table 3: Association of socio-demographic factors with diabetes mellitus**

| Variables and characteristics              | Number of Participants | Proportion with DM (%) | Odds of having DM |                 |
|--------------------------------------------|------------------------|------------------------|-------------------|-----------------|
|                                            |                        |                        | COR (95% CI)      | AOR (95% CI)    |
| <b>Age</b>                                 |                        |                        |                   |                 |
| 20-39                                      | 4,046                  | 115 (3.0)              | 1                 | 1               |
| 40-59                                      | 4,723                  | 469(10.4)              | 3.7(2.9-4.9)***   | 3.1(2.3-4.2)*** |
| 60 years and above                         | 2,508                  | 300(13.3)              | 4.9 (3.7-6.5)***  | 4.7(3.3-6.6)*** |
| <b>Sex</b>                                 |                        |                        |                   |                 |
| Female                                     | 6,952                  | 436(6.7)               | 1                 | 1               |
| Male                                       | 4,325                  | 448(11.0)              | 1.7(1.5-2.0)***   | 1.3(1.1- 1.6)** |
| <b>Ethnicity</b>                           |                        |                        |                   |                 |
| Disadvantaged janajatis                    | 1,130                  | 68(6.6)                | 1                 | 1               |
| Dalits                                     | 2,369                  | 151(6.7)               | 1.0(0.7-1.4)      | 1.3(0.8-1.9)    |
| Disadvantaged non-dalit terai caste groups | 1,690                  | 127(8.4)               | 1.3(1.0-1.7)      | 1.5(1.1-2.1)*   |
| Religious minorities                       | 285                    | 38(17.5)               | 2.9(1.7-5.0)***   | 2.4(1.2-4.7)*   |
| Relatively advantaged janajatis            | 1,884                  | 210(11.9)              | 1.9(1.4-2.5)***   | 1.2(0.9-1.6)    |
| Upper caste groups                         | 3,919                  | 290(7.8)               | 1.2(0.9-1.5)      | 1.0(0.7-1.3)    |

|                                 |       |           |                 |                 |
|---------------------------------|-------|-----------|-----------------|-----------------|
| <b>Education</b>                |       |           |                 |                 |
| Illiterate/No formal schooling  | 6,128 | 535(8.4)  | 1               | 1               |
| Below secondary (<10 years)     | 2,548 | 196(7.9)  | 1.0(0.8-1.2)    | 1.1(0.8-1.4)    |
| Secondary and above (≥10 years) | 2,601 | 274(10.1) | 1.3(1.1-1.6)**  | 1.4(1.1-1.8)*   |
| <b>Province</b>                 |       |           |                 |                 |
| Karnali Province                | 565   | 16(3.2)   | 1               | 1               |
| Province 1                      | 1,909 | 134(7.7)  | 2.5(1.2-5.2)*   | 2.2(1.1-4.4)*   |
| Province 2                      | 1,845 | 138(8.5)  | 2.8(1.3-5.8)**  | 1.8(0.9-3.7)    |
| Bagmati Province                | 2,820 | 298(11.5) | 3.9(1.9-8.0)*** | 1.8(0.9-3.5)    |
| Gandaki Province                | 1,249 | 79(6.7)   | 2.2(1.0-4.6)*   | 1.1(0.6-2.3)    |
| Lumbini                         | 1,905 | 170(9.6)  | 3.2(1.5-6.6)**  | 1.9(0.9-3.8)    |
| Sudurpaschim Province           | 984   | 49(5.2)   | 1.6(0.7-3.8)    | 1.5(0.7-3.5)    |
| <b>Place of residence</b>       |       |           |                 |                 |
| Rural                           | 5,663 | 277(5.5)  | 1               | 1               |
| Urban                           | 5,614 | 607(11.3) | 2.2(1.8-2.7)*** | 1.7(1.4-2.2)*** |

186 1 Reference category, \*p value≤0.05 \*\*p value≤0.01 \*\*\*p value≤0.0001

187 **Table 4: Association of behavioural and biological factors with diabetes mellitus**

| Characteristics                                            | Number of Participants | Proportion with DM<br>n (%) | Odds of having DM |              |
|------------------------------------------------------------|------------------------|-----------------------------|-------------------|--------------|
|                                                            |                        |                             | COR (95% CI)      | AOR (95% CI) |
| <b>Smoking habit</b>                                       |                        |                             |                   |              |
| Non smoker                                                 | 7,789                  | 581(8.0)                    | 1                 | 1            |
| Smokers                                                    | 3,488                  | 303(9.5)                    | 1.2(1.0-1.4)*     | 1.0(0.9-1.3) |
| <b>Users of smokeless tobacco products</b>                 |                        |                             |                   |              |
| Nonusers                                                   | 8,544                  | 642(8.1)                    | 1                 | -            |
| Users                                                      | 2,733                  | 242(9.7)                    | 1.2(1.0-1.5)*     | -            |
| <b>Users of either smoke or smokeless tobacco products</b> |                        |                             |                   |              |
| Nonusers                                                   | 9,857                  | 751(8.3)                    | 1                 | -            |
| Users                                                      | 1,420                  | 133(10.1)                   | 1.2(1.0-1.5)      | -            |
| <b>Alcohol consumption</b>                                 |                        |                             |                   |              |
| No                                                         | 8,538                  | 657(8.4)                    | 1                 | -            |
| Yes                                                        | 2,739                  | 227(8.7)                    | 1.0(0.9-1.2)      | -            |
| <b>Blood pressure</b>                                      |                        |                             |                   |              |
| Normal                                                     | 7,197                  | 311 (4.6)                   | 1                 | 1            |

|                                                 |       |            |                      |                 |
|-------------------------------------------------|-------|------------|----------------------|-----------------|
| Raised                                          | 4,080 | 573 (15.1) | 3.7 (3.1-4.4)<br>*** | 2.2(1.8-2.7)*** |
| <b>Body mass index (N=12,556)</b>               |       |            |                      |                 |
| Normal                                          | 6,378 | 355 (6.1)  | 1                    | 1               |
| Underweight                                     | 1,365 | 51 (4.0)   | 0.6(0.4-0.9) *       | 0.8(0.5-1.1)    |
| Overweight and obese                            | 3,534 | 478 (14.6) | 2.6(2.2-3.1)<br>***  | 2.0(1.6-2.4)*** |
| <b>Increased Waist Hip ratio<br/>(N=11,158)</b> |       |            |                      |                 |
| No                                              | 4,683 | 347 (8.0)  | 1                    | -               |
| Yes                                             | 6,475 | 527 (8.9)  | 1.1(0.9-1.4)         | -               |
| <b>Total cholesterol (N=10,837)</b>             |       |            |                      |                 |
| Normal                                          | 7,722 | 478 (7.0)  | 1                    | 1               |
| Raised                                          | 3,115 | 357 (11.8) | 1.8(1.5-2.1)<br>***  | 1.0(0.8-1.2)    |
| <b>Triglyceride (N=10,960)</b>                  |       |            |                      |                 |
| Normal                                          | 7,103 | 334 (5.0)  | 1                    | 1               |
| Raised                                          | 3,857 | 479 (13.4) | 2.9 (2.5-3.5)<br>*** | 2.1(1.8-2.6)*** |

188 1 Reference category, \*p value≤0.05 \*\*p value≤0.01\*\*\* p value≤0.0001

## 189 DISCUSSION

190 The first nationally representative study identified high prevalence of DM among the  
191 participants, which is higher than the IDF's estimate for Nepal i.e 4% in 2017(21). However, the  
192 prevalence of DM is similar to the findings observed in a systematic review (pooled prevalence-  
193 -8.4%, 95% CI: 6.2-10.5%), which summarised the prevalence of type 2 diabetes in Nepal for a  
194 period of 14 years (8). Similar figure (8.5%, 95% CI: 6.9-10.4%) was reported in another systematic  
195 review conducted in Nepal(22). Our finding is also in line with the WHO estimates for DM in Nepal  
196 which reported a prevalence of 9.1% in 2016(23). The latest estimates from the global burden of  
197 disease study, however, show a national prevalence of 4.4% of diabetes type 2(24). Likewise,  
198 WHO global report on DM also estimated a regional prevalence of 8.6% in South East Asia (SEA)  
199 in 2014, which is consistent with the findings from our study(4). The finding from our study is  
200 similar to estimates of DM prevalence from different studies in the neighbouring countries,  
201 including India (8.7%)(25), China (10.9%)(26), Sri Lanka (8.4%), Bhutan (7.7%), Maldives (7.5%)  
202 and Bangladesh (6.8%)(21). The prevalence of DM in our study may be attributed to a  
203 combination of factors including rapid urbanisation, changing lifestyles, unhealthy diets, tobacco  
204 use, and increasing life expectancy. Adding to this, several challenges prevailing around diabetes  
205 management such as high treatment cost, availability of limited health facilities, lack of awareness  
206 about the disease and particularly no specific guideline available for the prevention and  
207 treatment of the disease in Nepal might have exacerbated the burden of this disease(10).

208 Our study reports that age was significantly associated with DM, with older aged people (60 years  
209 and above) having higher odds of having DM. Older age as an important predictor for DM is

1  
2  
3 210 consistent with the findings of studies from different contexts(8, 9, 27-30). The life expectancy of  
4  
5  
6 211 Nepalese people has increased from 58 years in 1990 to 71 years in 2019(24) and the proportion  
7  
8 212 of the older population is growing (31), which further tends to increase in future(32). With aging,  
9  
10 213 skeletal muscle insulin sensitivity might be impaired which in turn increase the risk of insulin  
11  
12  
13 214 resistance and type 2 diabetes(33). The findings of the study and these factors underscore the  
14  
15 215 need of tailored interventions for management and control of DM among population with higher  
16  
17  
18 216 age. Further to this our study showed that, male had higher odds of having DM than females.  
19  
20 217 This finding is supported by an another study conducted in Nepal, which identified being female  
21  
22  
23 218 as significant protective factor for DM (AOR: 0.4, 95% CI: 0.3-0.7)(9). A systematic review  
24  
25 219 conducted in South Asia also supported the findings from our study, indicating being male as a  
26  
27  
28 220 significant risk factor for DM(34). However, this is in contrast to the findings reported in a  
29  
30 221 different systematic review suggesting that females were at higher risk of DM in Nepal (OR:1.6,  
31  
32 222 95% CI: 1.3-1.9)(8). Higher prevalence of DM among men has been associated with large amount  
33  
34  
35 223 of visceral fat in men(35). Besides, lower tendency of women to develop visceral adiposity may  
36  
37  
38 224 explain that women are protected from DM in comparison to men(36).  
39  
40 225 Our study reported that urban residents were more likely to have DM compared to those residing  
41  
42  
43 226 in rural areas. Nepal has been experiencing an increasing rate in urbanization(37). Increasing  
44  
45 227 urbanization leading to change in dietary pattern, sedentary lifestyle, reduction in physical  
46  
47  
48 228 activity might have contributed to the higher burden of DM. Complementing this result, findings  
49  
50 229 from NCDs STEPS survey 2019 suggests inadequate intake of fruits and vegetables and lower  
51  
52  
53 230 participation in physical activity among urban population compared to their rural  
54  
55 231 counterparts(38). All these factors might have some contributing role towards higher prevalence

1  
2  
3 232 of DM among urban population. Similar to the findings from this study, an epidemiological survey  
4  
5  
6 233 conducted by the Nepal Diabetes Association found higher prevalence (14.6%) of DM in urban  
7  
8 234 area in comparison to rural area (2.5%) (39, 40). Consistent with the findings from our study, a  
9  
10  
11 235 systematic review also found the pooled prevalence of DM to be higher (8.1%, 95% CI: 7.3-  
12  
13 236 8.9%) in urban areas compared to rural areas in Nepal (1.03%, 95% CI: 0.7-1.3%)(8). A study from  
14  
15 237 Myanmar also presented similar findings of higher prevalence in urban areas compared to rural  
16  
17  
18 238 areas (12.1% vs 7.1%)(41). Studies have reported between two to five times higher odds of having  
19  
20 239 DM and pre-DM in association with urban residence(42, 43).

21  
22  
23 240 Our study showed that participants with raised blood pressure had about two times higher odds  
24  
25  
26 241 of having DM compared to those whose blood pressure was normal. This result is consistent with  
27  
28 242 findings from South Asia(34), Ethiopia(44) and Nepal(8). The prevalence of hypertension and DM  
29  
30  
31 243 has been increasing in Nepal, however, the progress towards its effective prevention, treatment  
32  
33 244 and control is found to be low(9, 45). With the coexisting conditions of hypertension and DM, the  
34  
35 245 importance of secondary prevention (screening, timely diagnosis and treatment) of both these  
36  
37  
38 246 conditions is of paramount importance.

39  
40  
41 247 Overweight and obesity are important risk factors for DM (5, 44, 46). Our study showed that  
42  
43  
44 248 participants who were overweight and obese had about 2 times higher odds of having DM than  
45  
46 249 those with a normal BMI. Consistent with the findings from our study, a meta-analysis performed  
47  
48 250 among Indian adults showed a statistically significant association between obesity and type 2 DM  
49  
50  
51 251 (OR = 1.14, 95%CI: 1.0-1.2)(47). Similar findings were observed in different studies conducted in  
52  
53 252 South Asia(34), US(48), Ethiopia(44) and Nepal(49). Overweight and obesity has been increasing  
54  
55  
56 253 in Nepal particularly among women(50). Obesity being a strong predictor for DM, there is a need

254 to take preventive actions to control obesity which might in turn provide some level of control of  
255 growing DM prevalence in the country.

256 The other variable that showed significant association with the prevalence of DM was triglyceride  
257 level. Participants with a high triglyceride level ( $\geq 150$ mg/dl) had about 2 times higher odds of  
258 having DM than their counterparts. This is in line with findings from studies conducted elsewhere,  
259 including in Ethiopia(44), Bangladesh(51) and China(52). Similar findings have been reported by  
260 different previous studies from Nepal(53-55). This also highlights the need of interventions for  
261 prevention and control of several of these metabolic risk factors such as dyslipidemia so as to  
262 achieve DM control in Nepal.

263 Besides the factors explained above, the provincial differences in prevalence of DM (though not  
264 seen as statistically significant after multivariate analysis) also highlights the importance of  
265 tailoring interventions to the provinces with higher prevalence such as Province 1, 2, 5 and  
266 Bagmati Province.

267 Our study has several strengths and limitations. Major strengths include: a large sample size,  
268 coverage of rural and urban residences; all three ecological belts of the country (the Terai, hills  
269 and mountains); and all provinces of Nepal. This approach provided nationally representative  
270 data and increased its generalizability among the Nepalese population. The study also provided  
271 detailed information on the possible association with a wide range of risk factors for DM.  
272 However, the cross-sectional nature of the study did not allow for a causal relationship to be  
273 established between these risk factors and the prevalence of DM. In addition, no information  
274 was collected on the physical activity and dietary habits of participants, which have been  
275 established as important predictors of DM in other studies (56-59).



## 276 CONCLUSIONS

277 Our study showed DM to be more prevalent among individuals aged 20 years and above. Older  
278 age, male gender, residing in urban areas, high BMI, raised blood pressure, and raised triglyceride  
279 level independently predicted the occurrence of DM in this study. Findings suggest that targeted  
280 DM prevention and control interventions, especially to those population groups with higher  
281 chances of DM occurrence, in addition to prevention and control of the biological risk factors  
282 associated with DM through appropriate measures, would help curb the prevalence of DM in  
283 Nepal.

## 284 Acknowledgements

285 The authors would like to acknowledge all the study participants and field enumerators for their  
286 invaluable support. We further acknowledge the Steering Committee members and the Technical  
287 Working Group members who guided the study. We sincerely acknowledge the support of  
288 Matilda Nash from Abt Britain in reviewing and copyediting the manuscript.

289 **Author's contributions** KBK, KKA and MD conceived the study. NG and DKC helped in data  
290 entry and management. KKA and NS was involved in conducting data analysis. NS, KKA, AP and  
291 NKM wrote the manuscript. PG and AKJ supported in monitoring overall data quality. All authors  
292 reviewed the manuscript. NS and KBK contributed equally.

293 **Funding statement** The authors have not received specific grant from any agency for this  
294 research.

295 **Competing interest** The authors declare no conflict of interest.

296 **Patient consent for publication** Not required.

297 **Data sharing statement** Data will be made available on request.

298 **Word count** 3486

299

## 300 REFERENCES

- 301 1. Saeedi P, Petersohn I, Salpea P, Malanda B, Karuranga S, Unwin N, et al. Global and  
302 regional diabetes prevalence estimates for 2019 and projections for 2030 and 2045: Results from  
303 the International Diabetes Federation Diabetes Atlas. *Diabetes research and clinical practice*.  
304 2019;157:107843.
- 305 2. Diabetes [Internet]. 2021 [cited 28 September 2021]. Available from:  
306 <https://www.who.int/news-room/fact-sheets/detail/diabetes>.
- 307 3. IDF. Diabetes facts & figures 2017 [cited 2019]. Available from:  
308 <https://www.idf.org/aboutdiabetes/what-is-diabetes/facts-figures.html>.
- 309 4. WHO. Global report on diabetes. 2016.
- 310 5. Hills AP, Arena R, Khunti K, Yajnik CS, Jayawardena R, Henry CJ, et al. Epidemiology and  
311 determinants of type 2 diabetes in south Asia. *The Lancet Diabetes & Endocrinology*. 2018.

- 1  
2  
3 312 6. IDF. IDF South-East Asia 2017 [cited 2019]. Available from: [https://idf.org/our-](https://idf.org/our-network/regions-members/south-east-asia/welcome.html)  
4  
5  
6 313 [network/regions-members/south-east-asia/welcome.html](https://idf.org/our-network/regions-members/south-east-asia/welcome.html).  
7  
8 314 7. IDF. Nepal Country report 2017 & 2045. Available from:  
9  
10 315 <https://reports.instantatlas.com/report/view/704ee0e6475b4af885051bcec15f0e2c/NPL>.  
11  
12  
13 316 8. Gyawali B, Sharma R, Neupane D, Mishra SR, van Teijlingen E, Kallestrup P. Prevalence of  
14  
15 317 type 2 diabetes in Nepal: a systematic review and meta-analysis from 2000 to 2014. *Global health*  
16  
17 318 *action*. 2015;8(1):29088.  
19  
20 319 9. Gyawali B, Hansen MRH, Povlsen MB, Neupane D, Andersen PK, McLachlan CS, et al.  
21  
22 320 Awareness, prevalence, treatment, and control of type 2 diabetes in a semi-urban area of Nepal:  
23  
24 321 Findings from a cross-sectional study conducted as a part of COBIN-D trial. *PloS one*.  
25  
26 322 2018;13(11):e0206491.  
27  
28  
29  
30 323 10. Gyawali B, Ferrario A, Van Teijlingen E, Kallestrup P. Challenges in diabetes mellitus type  
31  
32 324 2 management in Nepal: a literature review. *Global health action*. 2016;9(1):31704.  
33  
34  
35 325 11. Shakya B, Shrestha N, Shrestha S. An Epidemiological Study of Diabetes Mellitus in  
36  
37 326 Productive Aged Urban Nepalese of Makalbari Area of Gokarneshwor Municipality. *Nepal*  
38  
39 327 *Medical College Journal*. 2020;22(3):173-80.  
40  
41  
42 328 12. Rajbhandari B, Hyoju SP, Poudel L, Adhikari A, Rijal B, Joshi P. Prevalence of Type 2  
43  
44 329 Diabetes among Patients Visiting Nepal Police Hospital in Kathmandu: A Descriptive Cross-  
45  
46 330 sectional Study. *JNMA: Journal of the Nepal Medical Association*. 2021;59(233):42.  
47  
48  
49 331 13. Aryal KK, Mehata S, Neupane S, Vaidya A, Dhimal M, Dhakal P, et al. The burden and  
50  
51 332 determinants of non communicable diseases risk factors in Nepal: findings from a nationwide  
52  
53 333 STEPS survey. *PloS one*. 2015;10(8):e0134834.  
54  
55  
56  
57  
58  
59  
60

- 1  
2  
3 334 14. NHRC. Population Based Prevalence of Selected Non-Communicable Diseases in Nepal.  
4  
5  
6 335 Kathmandu, Nepal: Nepal Health Research Council, Government of Nepal, 2019.  
7  
8 336 15. Karki KB, Thapa P, Dhimal M, Bista B, Joshi A, Poudyal A, et al. Anemia and its  
9  
10 337 Determinants among Women of Reproductive Age in Mid-Western Tarai of Nepal, 2015.  
11  
12  
13 338 Kathmandu, Nepal: Nepal Health Research Council, 2016.  
14  
15 339 16. Karki KB, Aryal KK, Dhimal M, Mehta S, Pandey AR, Bista B, et al. Community Based  
16  
17 340 Intervention for Prevention and Control of NCD Risk Factors (CIPCON). Kathmandu, Nepal: 2017.  
18  
19  
20 341 17. Thapa N, Aryal KK, Puri R, Shrestha S, Shrestha S, Thapa P, et al. Alcohol consumption  
21  
22 342 practices among married women of reproductive age in Nepal: a population based household  
23  
24 343 survey. PloS one. 2016;11(4):e0152535.  
25  
26  
27 344 18. Association AD. Diagnosis and classification of diabetes mellitus. Diabetes care.  
28  
29 345 2010;33(Supplement 1):S62-S9.  
30  
31  
32 346 19. Aryal KK. Non communicable diseases risk factors: STEPS Survey Nepal 2013: Nepal Health  
33  
34 347 Research Council (NHRC); 2014.  
35  
36  
37 348 20. Basit A, Fawwad A, Qureshi H, Shera A. Prevalence of diabetes, pre-diabetes and  
38  
39 349 associated risk factors: second National Diabetes Survey of Pakistan (NDSP), 2016–2017. BMJ  
40  
41 350 open. 2018;8(8):e020961.  
42  
43  
44 351 21. IDF. Diabetes in South-East Asia 2017 [cited 2019]. Available from:  
45  
46 352 <https://www.idf.org/our-network/regions-members/south-east-asia/diabetes-in-sea.html>.  
47  
48  
49 353 22. Shrestha N, Mishra SR, Ghimire S, Gyawali B, Mehata S. Burden of diabetes and  
50  
51 354 prediabetes in Nepal: A systematic review and meta-analysis. Diabetes Therapy. 2020:1-12.  
52  
53  
54  
55  
56  
57  
58  
59  
60

- 1  
2  
3 355 23. WHO. Diabetes country profile:Nepal 2016. Available from:  
4  
5  
6 356 [https://www.who.int/diabetes/country-profiles/npl\\_en.pdf](https://www.who.int/diabetes/country-profiles/npl_en.pdf).  
7  
8 357 24. GBD Compare [Internet]. IHME, University of Washington. 2019 [cited 9 October 2021].  
9  
10 358 Available from: <http://vizhub.healthdata.org/gbd-compare>.  
11  
12  
13 359 25. WHO. Diabetes 2019 [cited 2019]. Available from:  
14  
15 360 [http://www.searo.who.int/india/topics/diabetes\\_mellitus/en/](http://www.searo.who.int/india/topics/diabetes_mellitus/en/).  
16  
17  
18 361 26. IDF. IDF Western Pacific members 2017 [cited 2019]. Available from:  
19  
20 362 <https://www.idf.org/our-network/regions-members/western-pacific/members/101-china.html>.  
21  
22  
23 363 27. Akter S, Rahman MM, Abe SK, Sultana P. Prevalence of diabetes and prediabetes and their  
24  
25 364 risk factors among Bangladeshi adults: a nationwide survey. Bulletin of the World Health  
26  
27 365 Organization. 2014;92:204-13A.  
28  
29  
30 366 28. CDC. National Diabetes Statistics Report. 2017.  
31  
32  
33 367 29. Liu J, Zhao D, Liu J, Qi Y, Sun J, Wang W. Prevalence of diabetes mellitus in outpatients  
34  
35 368 with essential hypertension in China: a cross-sectional study. BMJ open. 2013;3(11):e003798.  
36  
37  
38 369 30. Uloko AE, Musa BM, Ramalan MA, Gezawa ID, Puepet FH, Uloko AT, et al. Prevalence and  
39  
40 370 risk factors for diabetes mellitus in Nigeria: a systematic review and meta-analysis. Diabetes  
41  
42 371 Therapy. 2018;9(3):1307-16.  
43  
44  
45 372 31. Nepal [Internet]. 2020 [cited 9 October 2021]. Available from:  
46  
47 373 <https://knoema.com/atlas/Nepal/Population-aged-65-years-and-above>.  
48  
49  
50 374 32. Aryal GR. The Status of Elderly People in Nepal. Patan Pragya. 2019;5(1):11-8.  
51  
52 375 33. Shou J, Chen P-J, Xiao W-H. Mechanism of increased risk of insulin resistance in aging  
53  
54 376 skeletal muscle. Diabetology & metabolic syndrome. 2020;12(1):1-10.  
55  
56  
57  
58  
59  
60

- 1  
2  
3 377 34. Jayawardena R, Ranasinghe P, Byrne NM, Soares MJ, Katulanda P, Hills AP. Prevalence  
4  
5  
6 378 and trends of the diabetes epidemic in South Asia: a systematic review and meta-analysis. BMC  
7  
8 379 public health. 2012;12(1):380.  
9  
10 380 35. Nordström\* A, Hadrévi J, Olsson T, Franks PW, Nordström P. Higher prevalence of type 2  
11  
12  
13 381 diabetes in men than in women is associated with differences in visceral fat mass. The Journal of  
14  
15 382 Clinical Endocrinology & Metabolism. 2016;101(10):3740-6.  
16  
17  
18 383 36. Arnetz L, Ekberg NR, Alvarsson M. Sex differences in type 2 diabetes: focus on disease  
19  
20 384 course and outcomes. Diabetes, metabolic syndrome and obesity: targets and therapy.  
21  
22 385 2014;7:409.  
23  
24  
25 386 37. Nepal: Degree of urbanization from 2010 to 2020 [Internet]. 2021 [cited 9 October 2021].  
26  
27 387 Available from: <https://www.statista.com/statistics/422620/urbanization-in-nepal/>.  
28  
29  
30 388 38. Dhimal M, Bista B, Bhattarai S, Dixit LP, Hyder MKA, Agrawal N, et al. Report of Non  
31  
32 389 Communicable Disease Risk Factors: STEPS Survey Nepal 2019. Kathmandu, Nepal: Nepal Health  
33  
34 390 Research Council, 2020.  
35  
36  
37 391 39. The prevalence of diabetes in the people 20 years and above. 2016.  
38  
39  
40 392 40. Editorial. Epidemic of Diabetes in urban Nepal-time to act. Journal of Nepal Medical  
41  
42 393 Association. 2003.  
43  
44  
45 394 41. Aung WP, Htet AS, Bjertness E, Stigum H, Chongsuvivatwong V, Kjøllesdal MKR. Urban–  
46  
47 395 rural differences in the prevalence of diabetes mellitus among 25–74 year-old adults of the  
48  
49 396 Yangon Region, Myanmar: two cross-sectional studies. BMJ open. 2018;8(3):e020406.  
50  
51  
52  
53  
54  
55  
56  
57  
58  
59  
60

- 1  
2  
3 397 42. Alam DS, Talukder SH, Chowdhury MAH, Siddiquee AT, Ahmed S, Pervin S, et al.  
4  
5  
6 398 Overweight and abdominal obesity as determinants of undiagnosed diabetes and pre-diabetes  
7  
8 399 in Bangladesh. *BMC obesity*. 2016;3(1):19.  
9  
10  
11 400 43. Asmelash D, Asmelash Y. The Burden of Undiagnosed Diabetes Mellitus in Adult African  
12  
13 401 Population: A Systematic Review and Meta-Analysis. *Journal of diabetes research*. 2019;2019.  
14  
15  
16 402 44. Aynalem SB, Zeleke AJ. Prevalence of diabetes mellitus and its risk factors among  
17  
18 403 individuals aged 15 years and above in Mizan-Aman town, Southwest Ethiopia, 2016: a cross  
19  
20 404 sectional study. *International journal of endocrinology*. 2018;2018.  
21  
22  
23 405 45. Dhungana RR, Pandey AR, Shrestha N. Trends in the Prevalence, Awareness, Treatment,  
24  
25 406 and Control of Hypertension in Nepal between 2000 and 2025: A Systematic Review and Meta-  
26  
27 407 Analysis. *International journal of hypertension*. 2021;2021.  
28  
29  
30 408 46. Worede A, Alemu S, Gelaw YA, Abebe M. The prevalence of impaired fasting glucose and  
31  
32 409 undiagnosed diabetes mellitus and associated risk factors among adults living in a rural Koladiba  
33  
34 410 town, northwest Ethiopia. *BMC research notes*. 2017;10(1):251.  
35  
36  
37 411 47. Babu GR, Murthy G, Ana Y, Patel P, Deepa R, Neelon SEB, et al. Association of obesity with  
38  
39 412 hypertension and type 2 diabetes mellitus in India: A meta-analysis of observational studies.  
40  
41 413 *World journal of diabetes*. 2018;9(1):40.  
42  
43  
44 414 48. Conway BN, Han X, Munro HM, Gross AL, Shu X-O, Hargreaves MK, et al. The obesity  
45  
46 415 epidemic and rising diabetes incidence in a low-income racially diverse southern US cohort. *PLoS*  
47  
48 416 *one*. 2018;13(1):e0190993.  
49  
50  
51  
52  
53  
54  
55  
56  
57  
58  
59  
60

- 1  
2  
3 417 49. Shah A, Parthasarathi D, Sarkar D, Saha C. A comparative study of body mass index (BMI)  
4  
5  
6 418 in diabetic and non-diabetic individuals in Nepalese population. Kathmandu University medical  
7  
8 419 journal (KUMJ). 2006;4(1):4-10.  
9  
10  
11 420 50. Rana K, Ghimire P, Chimoriya R, Chimoriya R. Trends in the Prevalence of Overweight and  
12  
13 421 Obesity and Associated Socioeconomic and Household Environmental Factors among Women in  
14  
15 422 Nepal: Findings from the Nepal Demographic and Health Surveys. *Obesities*. 2021;1(2):113-35.  
16  
17  
18 423 51. Bhowmik B, Siddiquee T, Mujumder A, Afsana F, Ahmed T, Mdala I, et al. Serum lipid  
19  
20 424 profile and its association with diabetes and prediabetes in a rural Bangladeshi population.  
21  
22 425 *International journal of environmental research and public health*. 2018;15(9):1944.  
23  
24  
25 426 52. Cui J, Sun J, Wang W, Xin H, Qiao Q, Baloch Z, et al. The association of triglycerides and  
26  
27 427 total cholesterol concentrations with newly diagnosed diabetes in adults in china. *Oncotarget*.  
28  
29 428 2017;8(61):103477.  
30  
31  
32 429 53. Thapa SD, KC SR, Gautam S, Gyawali D. Dyslipidemia in type 2 diabetes mellitus. *Journal*  
33  
34 430 *of pathology of Nepal*. 2017;7(2):1149-54.  
35  
36  
37 431 54. Pokhrel S, Shrestha S, Timilsina A, Sapkota M, Bhatt MP, Pardhe BD. Self-care adherence  
38  
39 432 and barriers to good glycaemic control in Nepalese type 2 diabetes mellitus patients: a hospital-  
40  
41 433 based cross-sectional study. *Journal of multidisciplinary healthcare*. 2019;12:817.  
42  
43  
44 434 55. Parajuli H, Shakya J, Pardhe BD, Khanal PR, Parajuli NP, Maharjan P, et al. Elevated serum  
45  
46 435 uric acid and triglycerides level in the patients with Type II Diabetes Mellitus-a Nepalese case  
47  
48 436 control study. *Annals of Clinical Chemistry and Laboratory Medicine*. 2016;2(2):26-34.  
49  
50  
51  
52  
53  
54  
55  
56  
57  
58  
59  
60



- 1  
2  
3 437 56. Hjerkind KV, Stenehjem JS, Nilsen TI. Adiposity, physical activity and risk of diabetes  
4  
5  
6 438 mellitus: prospective data from the population-based HUNT study, Norway. *BMJ open*.  
7  
8 439 2017;7(1):e013142.  
9  
10 440 57. Jannasch F, Kröger J, Schulze MB. Dietary patterns and type 2 diabetes: a systematic  
11  
12  
13 441 literature review and meta-analysis of prospective studies. *The Journal of nutrition*.  
14  
15 442 2017;147(6):1174-82.  
16  
17  
18 443 58. Sami W, Ansari T, Butt NS, Ab Hamid MR. Effect of diet on type 2 diabetes mellitus: A  
19  
20 444 review. *International journal of health sciences*. 2017;11(2):65.  
21  
22  
23 445 59. Wei M, Schwertner HA, Blair SN. The association between physical activity, physical  
24  
25 446 fitness, and type 2 diabetes mellitus. *Comprehensive therapy*. 2000;26(3):176-82.  
26  
27  
28 447  
29  
30  
31 448  
32 449

STROBE Statement—Checklist of items that should be included in reports of *cross-sectional studies*

|                              | Item No | Recommendation                                                                                                                                                                                               | Page No  |
|------------------------------|---------|--------------------------------------------------------------------------------------------------------------------------------------------------------------------------------------------------------------|----------|
| <b>Title and abstract</b>    | 1       | (a) Indicate the study's design with a commonly used term in the title or the abstract                                                                                                                       | 2        |
|                              |         | (b) Provide in the abstract an informative and balanced summary of what was done and what was found                                                                                                          | 2,3      |
| <b>Introduction</b>          |         |                                                                                                                                                                                                              |          |
| Background/rationale         | 2       | Explain the scientific background and rationale for the investigation being reported                                                                                                                         | 4,5      |
| Objectives                   | 3       | State specific objectives, including any prespecified hypotheses                                                                                                                                             | 5        |
| <b>Methods</b>               |         |                                                                                                                                                                                                              |          |
| Study design                 | 4       | Present key elements of study design early in the paper                                                                                                                                                      | 5        |
| Setting                      | 5       | Describe the setting, locations, and relevant dates, including periods of recruitment, exposure, follow-up, and data collection                                                                              | 5        |
| Participants                 | 6       | (a) Give the eligibility criteria, and the sources and methods of selection of participants                                                                                                                  | 5        |
| Variables                    | 7       | Clearly define all outcomes, exposures, predictors, potential confounders, and effect modifiers. Give diagnostic criteria, if applicable                                                                     | 6, 7     |
| Data sources/<br>measurement | 8*      | For each variable of interest, give sources of data and details of methods of assessment (measurement). Describe comparability of assessment methods if there is more than one group                         | 7        |
| Bias                         | 9       | Describe any efforts to address potential sources of bias                                                                                                                                                    | N/A      |
| Study size                   | 10      | Explain how the study size was arrived at                                                                                                                                                                    | 5        |
| Quantitative variables       | 11      | Explain how quantitative variables were handled in the analyses. If applicable, describe which groupings were chosen and why                                                                                 | 6, 7     |
| Statistical methods          | 12      | (a) Describe all statistical methods, including those used to control for confounding                                                                                                                        | 7        |
|                              |         | (b) Describe any methods used to examine subgroups and interactions                                                                                                                                          | 7        |
|                              |         | (c) Explain how missing data were addressed                                                                                                                                                                  | 7        |
|                              |         | (d) If applicable, describe analytical methods taking account of sampling strategy                                                                                                                           | 7        |
|                              |         | (e) Describe any sensitivity analyses                                                                                                                                                                        | N/A      |
| <b>Results</b>               |         |                                                                                                                                                                                                              |          |
| Participants                 | 13*     | (a) Report numbers of individuals at each stage of study—eg numbers potentially eligible, examined for eligibility, confirmed eligible, included in the study, completing follow-up, and analysed            | 5        |
|                              |         | (b) Give reasons for non-participation at each stage                                                                                                                                                         | N/A      |
|                              |         | (c) Consider use of a flow diagram                                                                                                                                                                           | N/A      |
| Descriptive data             | 14*     | (a) Give characteristics of study participants (eg demographic, clinical, social) and information on exposures and potential confounders                                                                     | 8 to 10  |
|                              |         | (b) Indicate number of participants with missing data for each variable of interest                                                                                                                          | 11       |
| Outcome data                 | 15*     | Report numbers of outcome events or summary measures                                                                                                                                                         | 12       |
| Main results                 | 16      | (a) Give unadjusted estimates and, if applicable, confounder-adjusted estimates and their precision (eg, 95% confidence interval). Make clear which confounders were adjusted for and why they were included | 12 to 16 |

|                          |    |                                                                                                                                                                            |          |
|--------------------------|----|----------------------------------------------------------------------------------------------------------------------------------------------------------------------------|----------|
|                          |    | (b) Report category boundaries when continuous variables were categorized                                                                                                  | N/A      |
|                          |    | (c) If relevant, consider translating estimates of relative risk into absolute risk for a meaningful time period                                                           | N/A      |
| Other analyses           | 17 | Report other analyses done—eg analyses of subgroups and interactions, and sensitivity analyses                                                                             | N/A      |
| <b>Discussion</b>        |    |                                                                                                                                                                            |          |
| Key results              | 18 | Summarise key results with reference to study objectives                                                                                                                   | 8 to 16  |
| Limitations              | 19 | Discuss limitations of the study, taking into account sources of potential bias or imprecision. Discuss both direction and magnitude of any potential bias                 | 20       |
| Interpretation           | 20 | Give a cautious overall interpretation of results considering objectives, limitations, multiplicity of analyses, results from similar studies, and other relevant evidence | 16 to 20 |
| Generalisability         | 21 | Discuss the generalisability (external validity) of the study results                                                                                                      | 20       |
| <b>Other information</b> |    |                                                                                                                                                                            |          |
| Funding                  | 22 | Give the source of funding and the role of the funders for the present study and, if applicable, for the original study on which the present article is based              | 22       |

\*Give information separately for exposed and unexposed groups.

**Note:** An Explanation and Elaboration article discusses each checklist item and gives methodological background and published examples of transparent reporting. The STROBE checklist is best used in conjunction with this article (freely available on the Web sites of PLoS Medicine at <http://www.plosmedicine.org/>, Annals of Internal Medicine at <http://www.annals.org/>, and Epidemiology at <http://www.epidem.com/>). Information on the STROBE Initiative is available at [www.strobe-statement.org](http://www.strobe-statement.org).
